1 **Human gut bifidobacteria inhibit the growth of the opportunistic fungal pathogen**

2 ***Candida albicans***

3 *Liviana Ricci*<sup>1,2</sup>, *Joanna Mackie*<sup>3</sup>, *Gillian E. Donachie*<sup>1</sup>, *Ambre Chapuis*<sup>3</sup>, *Kristýna Mezerová*<sup>4</sup>,

4 *Megan D. Lenardon*<sup>3,5</sup>, *Alistair J. P. Brown*<sup>3,6</sup>, *Sylvia H. Duncan*<sup>1</sup>, *Alan W. Walker*<sup>1\*</sup>

5 <sup>1</sup> Rowett Institute, University of Aberdeen, Aberdeen, AB25 2ZD, UK

6 <sup>3</sup> Aberdeen Fungal Group, Institute of Medical Sciences, University of Aberdeen, Aberdeen,  
7 AB25 2ZD, UK

8 <sup>4</sup> Department of Microbiology, Faculty of Medicine and Dentistry, Palacký University  
9 Olomouc, Olomouc, 775 15, Czech Republic

10 Current addresses:

11 <sup>2</sup> CIBIO - Department of Cellular, Computational and Integrative Biology, University of  
12 Trento, Trento, 38123, Italy

13 <sup>5</sup> School of Biotechnology and Biomolecular Sciences, University of New South Wales,  
14 Sydney, 2052, Australia

15 <sup>6</sup> MRC Centre for Medical Mycology, University of Exeter, Exeter, EX4 4QD, UK

16

17 \*Corresponding author: Alan W. Walker ([alan.walker@abdn.ac.uk](mailto:alan.walker@abdn.ac.uk))

18 **ABSTRACT**

19 The human gut microbiota protects the host from invading pathogens and the overgrowth of  
20 indigenous opportunistic species via mechanisms such as competition for nutrients and by  
21 production of antimicrobial compounds. Here, we investigated the antagonist activity of human  
22 gut bacteria towards *Candida albicans*, an opportunistic fungal pathogen that can cause severe  
23 infections and mortality in susceptible patients. Co-culture batch incubations of *C. albicans* in  
24 the presence of faecal microbiota from six different healthy individuals revealed varying levels  
25 of inhibitory activity against *C. albicans*. 16S rRNA gene sequence profiling of these faecal  
26 co-culture bacterial communities showed that the *Bifidobacteriaceae* family, and  
27 *Bifidobacterium adolescentis* in particular, were most correlated with antagonistic activity  
28 against *C. albicans*. Follow up mechanistic studies confirmed that culture supernatants of  
29 *Bifidobacterium* species, particularly *B. adolescentis*, inhibited *C. albicans in vitro* under both  
30 aerobic and anaerobic conditions. Production of the fermentation acids acetate and lactate,  
31 together with the concomitant decrease in pH, were strong drivers of the inhibitory activity.  
32 Bifidobacteria may therefore represent attractive targets for the development of probiotics and  
33 prebiotic interventions tailored to enhance inhibitory activity against *C. albicans in vivo*.

34

35

36

37 **Keywords:** Human gut microbiota, bifidobacteria, colonisation resistance, *Candida albicans*,  
38 short chain fatty acids, lactate, pH

## 39 INTRODUCTION

40 The human colon harbours a diverse microbiota that is dominated by obligate anaerobic  
41 bacteria (Whitman, Coleman and Wiebe 1998; Pasolli *et al.* 2019). The main energy sources  
42 for these gut microbes are non-digestible carbohydrates that resist digestion in the small  
43 intestine and become available for bacterial fermentation in the proximal colon (Flint *et al.*  
44 2015). These substrates are fermented by the gut microbiota to produce short-chain fatty acids  
45 (SCFAs), such as acetate, propionate and butyrate, and other fermentation acids such as lactate  
46 (Cummings 1981). SCFAs provide the host with up to 5–10% of their total daily energy  
47 requirement (Mortensen and Clausen 1996), and positively impact intestinal and systemic host  
48 health (Cummings 1981; Koh *et al.* 2016).

49

50 The intestinal microbiota also contributes to host health by bolstering resistance against  
51 colonisation of the gut by exogenous pathogens (Bohnhoff, Miller and Martin 1964; Buffie *et*  
52 *al.* 2015). This phenomenon, termed colonisation resistance, can prevent pathogens from  
53 establishing and replicating in the gut, or from reaching the densities required to invade deeper  
54 tissues and cause overt disease (Bohnhoff, Miller and Martin 1964). Colonisation resistance is  
55 multifactorial, involving mechanisms such as the direct production of antimicrobial  
56 compounds (Rea *et al.* 2010; Donia and Fischbach 2015), competition for adhesion receptors  
57 on the gut epithelium (Ventura *et al.* 2016), and direct competition for niches and nutrients  
58 required for the growth of competing pathogenic bacteria (Freter *et al.* 1983; Wilson and Perini  
59 1988; Deriu *et al.* 2013; Maltby *et al.* 2013). Additional mechanisms of colonisation resistance  
60 include the creation of a less favourable gut environment, for example lowering the luminal  
61 pH through the production of SCFAs (Cherrington *et al.* 1991; Roe *et al.* 2002; Rivera-Chávez  
62 *et al.* 2016), or depleting free molecular oxygen, which can prevent the overgrowth and  
63 virulence gene expression of some pathogenic microbes (Marteyn *et al.* 2011; Rivera-Chávez

64 *et al.* 2016). Furthermore, human gut commensals are instrumental in the training and  
65 modulation of the host immune system (Kau *et al.* 2011; Thaïss *et al.* 2016), inducing the  
66 release of host antimicrobial compounds (Cash *et al.* 2006; Fan *et al.* 2015), and in stimulating  
67 epithelial barrier reinforcement and repair (Rossi *et al.* 2015; Geirnaert *et al.* 2017).  
68 Importantly, microbiota-mediated colonisation resistance can be weakened by various  
69 environmental factors and insults, such as Western-style diet (Martinez-Medina *et al.* 2014),  
70 antibiotic therapy (Bohnhoff, Miller and Martin 1964; Vollaard EJ, Clasener HA 1992), and  
71 acute and chronic inflammatory conditions (Stecher *et al.* 2007; Carroll *et al.* 2012).

72

73 *Candida albicans* is a diploid polymorphic fungus and a common opportunistic pathogen of  
74 humans, with an estimated annual incidence of 700,000 cases of *Candida* bloodstream  
75 infections globally (Guinea 2014). In susceptible patient cohorts, including premature infants  
76 and those undergoing chemo-or immune-therapy, organ or stem cell transplants, or abdominal  
77 surgery or trauma, *C. albicans* infections can be particularly devastating, with mortality rates  
78 of 46–75% following systemic spread, even with antifungal drug interventions (Brown *et al.*  
79 2012). The incidence of *C. albicans* infections has increased in vulnerable subjects over the  
80 past few decades (Low and Rotstein 2011) alongside the emergence of other clinically  
81 important *Candida* spp., such as *C. auris* (Pfaller *et al.* 2000; Heaney *et al.* 2020). Furthermore,  
82 a significant increase of isolates with resistance to common antifungal agents has been  
83 observed (Whaley *et al.* 2016).

84

85 Despite the pathogenic potential of *C. albicans*, it exists harmlessly in the gastrointestinal tract  
86 (GIT) of 40–80% of healthy individuals in Western countries, predominantly in the yeast form,  
87 and with cell counts that do not typically exceed  $10^{4-5}$  colony forming units (CFU)/g faeces  
88 (Odds *et al.* 1989; Mason *et al.* 2012; Neville, d'Enfert and Bougnoux 2015; Harnett, Myers

89 and Rolfe 2017; Nash *et al.* 2017). The GIT is therefore a natural reservoir of *C. albicans* (Hube  
90 2004; Odds 2010) but, in health, its overgrowth is suppressed by the gut microbiota via  
91 colonisation resistance (Kennedy and Volz 1985a; Fan *et al.* 2015). However, conditions such  
92 as weakened immunity, increased permeability of the intestinal mucosal barrier, and/or  
93 perturbation of microbiota-mediated colonisation resistance via receipt of broad spectrum  
94 antibiotics can favour *C. albicans* pathogenesis (Samonis *et al.* 1994; León *et al.* 2009;  
95 Gammelsrud *et al.* 2011; d'Enfert *et al.* 2020). Furthermore, systemic candidiasis is often  
96 reported to derive from a preceding expansion of *Candida* spp. in the GIT and subsequent  
97 translocation from the intestinal niche into the bloodstream (Miranda *et al.* 2009; Zhai *et al.*  
98 2020). GIT colonisation by *C. albicans* is therefore a major risk factor for systemic candidiasis  
99 (Pittet *et al.* 1994).

100

101 Given the importance of the intestinal niche as a reservoir for systemic dissemination, and the  
102 known suppressive effects of the indigenous microbiota on the colonisation of the gut by *C.*  
103 *albicans* in health (Fan *et al.* 2015), we here assessed the potential of the human gut microbiota,  
104 and individual gut anaerobe species, to suppress the growth of this opportunistic pathogen *in*  
105 *vitro*. We identified specific bacterial isolates, including *Bifidobacterium adolescentis*, in faecal  
106 samples of healthy individuals that inhibit *C. albicans* growth *in vitro*, and revealed the  
107 involvement of gut bacterial fermentation acids and pH in this process. These findings suggest  
108 that it may be possible to enhance colonisation resistance against *C. albicans* invasive infection  
109 using targeted probiotics and/or dietary modulation of endogenous species with antagonistic  
110 activity against this opportunistic fungal pathogen.

111

## 112 **MATERIALS AND METHODS**

### 113 **Ethics**

114 Faecal sample collections used for isolation of human gut anaerobes, and for co-culture  
115 experiments with *C. albicans* were approved by the Ethical Review Panel of the Rowett  
116 Institute under study number 5946. All donors were received no antibiotic treatment for at least  
117 6 months prior to faecal donation.

118

### 119 **Cultivation of *C. albicans* strain SC5314**

120 *C. albicans* strain SC5314 (Gillum, Tsay and Kirsch 1984) was prepared by plating 2-10 µl of  
121 frozen glycerol stock on YPD plates (1% w/v yeast extract (Oxoid LP0021, Basingstoke, UK),  
122 2% w/v mycological peptone (Oxoid LP0040), 2% w/v D-glucose, and 2% w/v agar No. 2  
123 (Oxoid LP0012)) and incubating at 30°C for 48 h. A single colony was transferred from the  
124 Petri dish into NGY broth (0.1% yeast extract (Oxoid LP0021), 0.1% neopeptone (Difco,  
125 Franklin Lakes, NJ, USA), and 0.4% w/v D-glucose) (MacCallum *et al.* 2006) and incubated  
126 at 30°C, with shaking at 200 rpm, overnight. The concentration of *C. albicans* cells in  
127 suspension (cells/ml) was estimated by counting using a haemocytometer. Yeast growth was  
128 assessed by measuring optical density of the cultures at a wavelength of 600 nm using a  
129 spectrophotometer. For determination of *C. albicans* CFUs in samples, cells were plated on  
130 Sabouraud dextrose agar (SDA) (4% (w/v) D-glucose, 1% (w/v) mycological peptone, 2%  
131 (w/v) agar No. 2, pH 5.6).

132

### 133 **Batch co-cultures of *C. albicans* and mixed faecal microbiota from healthy donors**

134 Co-cultures of *C. albicans* and mixed faecal microbiota were performed in duplicate for each  
135 faecal donor in anaerobically sealed Wheaton bottles containing complex anaerobic medium.  
136 The medium contained (amounts given are for 1 L): oat spelt xylan (0.6 g; Sigma-Aldrich, St.  
137 Louis, MO, USA), pectin (citrus, 0.6 g; Sigma-Aldrich), amylopectin (0.6 g; Sigma-Aldrich),  
138 arabinogalactan (larch, 0.6 g; Sigma-Aldrich), potato starch (5.0 g; Sigma-Aldrich), inulin (0.6

139 g; Sigma-Aldrich), porcine mucin (0.5 g; Sigma-Aldrich), casein hydrolysate (0.5 g; Fluka,  
140 Charlotte, NC, USA), peptone water (0.5 g; Oxoid), K<sub>2</sub>HPO<sub>4</sub> (2.0 g; BDH, Dubai, UAE),  
141 NaHCO<sub>3</sub> (0.2 g; Sigma-Aldrich), NaCl (4.5 g; Fisher Scientific), MgSO<sub>4</sub> • 7H<sub>2</sub>O (0.5 g; BDH),  
142 CaCl<sub>2</sub> • 2H<sub>2</sub>O (0.45 g; Sigma-Aldrich), FeSO<sub>4</sub> • 7H<sub>2</sub>O (0.005 g; Hopkin & Willams, UK),  
143 haemin (0.01 g; Sigma-Aldrich), bile salts (0.05 g, Oxoid), 0.1% w/v resazurin (0.6 ml),  
144 antifoam A (Y-30, 0.5 ml; Sigma-Aldrich), and dH<sub>2</sub>O to 1 L. The pH was adjusted to 6.5 (using  
145 1 mM HCl and 1 mM NaOH, as appropriate) before dispensing the medium anaerobically and  
146 autoclaving. After autoclaving, the medium was supplemented with 2 mL mineral solution (150  
147 mg EDTA, 60 mg FeSO<sub>4</sub> • 7H<sub>2</sub>O, 3.0 mg ZnSO<sub>4</sub> • 7H<sub>2</sub>O, 0.9 mg MnCl<sub>2</sub> • 7H<sub>2</sub>O, 9.0 mg boric  
148 acid, 6.0 mg CoCl<sub>2</sub> • 6H<sub>2</sub>O, 0.3 mg CuCl<sub>2</sub> • 2H<sub>2</sub>O, 0.6 mg NiCl<sub>2</sub> • 6H<sub>2</sub>O, 0.9 mg NaMoO<sub>4</sub> •  
149 2H<sub>2</sub>O, and dH<sub>2</sub>O to 300 mL), 1.4 mL vitamin solution (0.2 g menadione, 0.4 g biotin, 0.4 g  
150 pantothenate, 2.0 g nicotinamide, 0.1 g vitamin B<sub>12</sub>, 0.8 g thiamine, 1.0 g *p*-aminobenzoic acid,  
151 and dH<sub>2</sub>O to 200 mL), and additional components (2 µg folic acid, 2000 µg inositol, 400 µg  
152 niacin, 400 µg pyridoxine HCl, 200 µg riboflavin, 100 µg potassium iodide, and 200 µg ferric  
153 chloride). In addition, each Wheaton bottle was supplemented with 40 mL filter-sterilised  
154 reducing solution to ensure anaerobic conditions (0.5 g cysteine, 3.0 g NaHCO<sub>3</sub>, and dH<sub>2</sub>O to  
155 40 mL).

156

157 *C. albicans* cells from an over-night culture grown in YPD broth were washed in sterile PBS,  
158 counted using a haemocytometer, and inoculated into 50 ml anaerobic media in Wheaton  
159 bottles at a final concentration of 5 x 10<sup>6</sup> cells/ml (except for one pilot experiment where the  
160 inoculum was 5 x 10<sup>5</sup> cells/ml, see Results section for more details). Faecal samples were  
161 obtained from six different donors. 10% (w/v) faecal slurries were prepared in gentleMACS™  
162 M tubes (Miltenyi Biotech, Auburn, CA, USA) by homogenisation in anaerobic PBS (PBS  
163 containing 0.05% cysteine). Faecal homogenates were centrifuged at 500 g for 5 min and the

164 liquid faecal component was injected into the Wheaton bottles using a sterile syringe (to give  
165 a 0.02% faecal suspension at baseline). The inoculated Wheaton bottles were incubated at 35°C  
166 for 48 h with gentle shaking at 75 rpm. Measurements of *C. albicans* colony forming units  
167 (CFUs) were carried out at t=0, 24 and 48 h by plating ten-fold serial dilutions on SDA plates  
168 supplemented with 34 µg/ml chloramphenicol. CFUs were counted after aerobic incubation at  
169 30°C for 2-3 d.

170

### 171 **16S rRNA gene sequencing of co-cultured incubation samples**

172 The faecal inocula from healthy donors used in the co-culture experiments, and from the two  
173 biological replicate samples collected after 24 and 48 h of incubation with *C. albicans*, were  
174 analysed by Illumina MiSeq-based 16S rRNA gene profiling, targeting the V1–V2 region of  
175 the gene. Genomic DNA was extracted using the FastDNA™ SPIN Kit for Soil (MP  
176 Biomedicals, Irvine, CA, USA) following the manufacturer’s instructions. Barcoded fusion  
177 primers containing adaptors for downstream Illumina MiSeq sequencing MiSeq-27F (5’-  
178 AATGATACGGCGACCACCGAGATCTACACTATGGTAATTCCAGMGTTYGATYMTG  
179 GCTCAG-3’) and MiSeq-338R (5’-CAAGCAGAAGACGGCATAACGAGAT-barcode-  
180 AGTCAGTCAGAAGCTGCCTCCCGTAGGAGT-3’) were used for PCR amplification of  
181 16S rRNA genes from extracted DNA. PCR was performed using Q5 Taq polymerase (New  
182 England Biolabs, Ipswich, MA), with the following cycling conditions: 98°C for 2 min;  
183 followed by 20 cycles at 98°C for 30 s, 50°C for 30 s, and 72°C for 90 s; with a final extension  
184 at 72°C for 5 min. Each sample was amplified in quadruplicate; the four reactions were pooled  
185 and PCR products were ethanol precipitated to generate a single PCR amplicon tube per  
186 sample. The PCR products were then quantified using a Qubit 2.0 fluorometer (Life  
187 Technologies, Carlsbad, CA, USA), and a sequencing master mix was prepared by mixing the  
188 samples in equimolar amounts, which was then sequenced at the Centre for Genome-Enabled



189 Biology and Medicine (CGEBM) at the University of Aberdeen (Aberdeen, UK). For  
190 sequencing, an Illumina MiSeq machine was used, with  $2 \times 250$  bp read length. The raw output  
191 sequence data are available from the European Nucleotide Archive, under the project accession  
192 number PRJEB48351. Individual sample accession numbers are given in **Table**  
193 **S1\_Supplementary Data**.

194

#### 195 **Analysis of 16S rRNA gene amplicon data**

196 The raw read data in fastq format were analysed using the open-source software Mothur  
197 (Schloss *et al.* 2009). For both of the timepoints after co-culture, the two experimental  
198 replicates were pooled into single samples for final analyses as no statistically significant  
199 differences were detected between replicates. Briefly, contigs were created using the  
200 make.contigs command and low quality contigs (such as with length  $<280$  or  $>470$  bases,  
201 containing at least one “N”, and polymeric stretches  $>7$  bases) were filtered out using  
202 screen.seqs. The contigs were aligned against the SILVA reference (<https://www.arb-silva.de/>)  
203 (Quast *et al.* 2013), and operational taxonomic units (OTUs) were generated at a 97% similarity  
204 cut-off level, with a pre-clustering step of  $\text{diffs}=3$  to reduce the impact of sequencing errors.  
205 Chimera removal software was not used as abundant OTUs corresponding to bifidobacteria  
206 were mistaken for chimeric sequences. Instead, the split.abund command was used to filter out  
207 low-abundance sequences that appeared less than 10 times in the dataset. All samples were  
208 rarefied to 9171 reads for subsequent comparative analyses. Samples derived from the D1 and  
209 D3 faecal inocula samples generated far fewer reads than this, so were excluded from the final  
210 analyses. Taxonomic classifications were assigned to each OTU by mapping against the RDP  
211 reference database (Cole *et al.* 2014). Taxonomies for selected OTUs were also validated by  
212 manually checking representative sequences using BLAST searches against the NCBI  
213 nucleotide database (<https://blast.ncbi.nlm.nih.gov/Blast.cgi>), and the Ribosomal Database

214 Project (Johnson *et al.* 2008; Cole *et al.* 2014). Alpha-diversity measures, and phylotype  
215 analyses at the phylum, family and genus levels were carried out using Mothur. The final OTU  
216 table, phylum, family, genus and alpha-diversity results for each sample are shown in **Table**  
217 **S1\_Supplementary Data**. The faecal and enriched microbial community co-culture samples  
218 were assigned to the categories ‘benign’ or ‘antagonistic’ according to the extent of the  
219 inhibition shown against *C. albicans*. Putative biomarkers at different taxonomic levels that  
220 correlated with antagonistic activity against *C. albicans* were assessed using LEfSe (Segata *et*  
221 *al.* 2011) as implemented in Mothur.

222

### 223 **Culturing of human gut anaerobes**

224 The gut anaerobes tested in the current study included isolates from the Rowett Institute  
225 (Aberdeen, UK) strain collection or purchased from DSMZ (Braunschweig, Germany) (**Table**  
226 **S2\_Supplementary Data**). The isolates were revived from stocks, anaerobically, in Hungate  
227 tubes containing M2GSC medium supplemented with 10% v/v clarified bovine rumen fluid  
228 (Bryant 1972; Miyazaki *et al.* 1997). Inoculated cultures were incubated at 37°C in a static 5%  
229 CO<sub>2</sub> incubator overnight (NuAire, Plymouth, MN, USA). Cell growth was monitored by  
230 measuring optical density at 650 nm (OD<sub>650</sub>) using a spectrophotometer (Novaspec II,  
231 Amersham BioSciences UK Ltd., Little Chalfont, UK).

232

233 Some of the anaerobic bacteria tested for anti-*Candida* activity in this study were newly  
234 isolated from the stool samples of two consenting adults (D3 and DM1). For each donor, 10-  
235 fold serial faecal dilutions were prepared in M2 medium (Hobson 1969) with no added carbon  
236 source. Each preparation was then used to inoculate five different agar plates: fastidious  
237 anaerobe agar (FAA, LAB M Ltd, Heywood, UK) supplemented with 5% v/v horse blood and  
238 0.5% w/v menadione; FAA supplemented with 5% v/v horse blood; brain heart infusion (BHI,

239 Oxoid); M2GSC (Miyazaki *et al.* 1997); and M2GSC supplemented with 0.5% w/v haemin  
240 and 0.5% w/v menadione. The plates were incubated in an anaerobic cabinet (Don Whitley  
241 Scientific, Bingley, UK) for 48 h. In parallel, faecal dilutions were pre-incubated in M2-AXOS  
242 diluting broth (M2 supplemented with 0.2% w/v arabinoxylan oligosaccharides; Cargill,  
243 Wayzata, MN, USA) before streaking. After 4 d of incubation, single colonies were selected  
244 and picked onto duplicates agar plates of the same type of culture medium they were first grown  
245 on. Half of these duplicate plates were left to grow in the anaerobic cabinet, while the remaining  
246 plates were incubated aerobically, at 37°C, for up to 48 h. At the end of the incubation, the  
247 growth on anaerobic plates was compared with that on the aerobic counterparts to screen for  
248 strictly anaerobic isolates. Single colonies were picked from plates that only showed anaerobic  
249 growth and then grown in Hungate tubes containing either M2GSC medium supplemented with  
250 0.5% w/v haemin and 0.5% w/v menadione, fastidious anaerobe broth supplemented with 5%  
251 v/v horse blood and 0.5% w/v menadione, or BHI broth. DNA was extracted from the collected  
252 cultures using the FastDNA<sup>TM</sup> SPIN Kit for Soil (MP Biomedicals) and 16S rRNA genes were  
253 Sanger sequenced (Eurofins Genomics) for taxonomic identification. Culturing conditions used  
254 to obtain each of the novel isolates are shown in **Table S3\_Supplementary Data**.

255

### 256 **Inhibition of *C. albicans* growth by gut bacterial supernatants and gut bacterial** 257 **fermentation acids**

258 In order to assess the effect of individual gut bacterial isolates on the growth of *C. albicans*  
259 SC5314, anaerobes of interest (**Table S2\_Supplementary Data**) were cultured in tubes with  
260 anaerobic M2GSC medium at 37°C overnight. The individual culture supernatants were then  
261 collected after centrifugation at 658 × g for 10 min. The supernatants were filter-sterilised by  
262 passing through 0.2 µm syringe-driven filter units (Millex, Merck Millipore Ltd, Kenilworth,  
263 NJ, USA) to remove residual bacterial cells. *C. albicans* cells pre-grown in NGY to an OD<sub>600</sub>

264 of 0.8-0.95 were diluted 1 in 100 in fresh NGY medium and 100  $\mu$ L was transferred to wells  
265 of 96-well microtitre plates (CoStar, Washington, WA, USA). The *C. albicans* suspensions  
266 were incubated with an equal amount of filter-sterilised bacterial culture supernatant, or fresh  
267 NGY medium as a control, to assess the fungal growth, with technical replicates. The 96-well  
268 plates were incubated anaerobically in a temperature-controlled plate reader at 37°C (Epoch 2  
269 Microplate Spectrophotometer, BioTek, Swindon, UK). For each test and technical replicate,  
270 the growth of *C. albicans* was calculated by subtracting the OD<sub>600</sub> value at time 0 from that  
271 measured after 24 h (T<sub>24</sub>–T<sub>0</sub>). The percentage growth of the fungus in fresh NGY medium in  
272 the absence of bacterial supernatant was set as 100% growth reference for each repeat run, and  
273 uninoculated filter-sterilised M2GSC medium was used as a control.

274

275 The impact of gut bacterial fermentation acids on *C. albicans* growth was assessed by  
276 monitoring fungal growth in the presence of a mixed solution of 45 mM sodium acetate (Sigma-  
277 Aldrich), 15 mM lactate (Sigma-Aldrich), and 10 mM sodium formate (VWR BDH Chemicals,  
278 Merck), supplemented with 0.4% w/v glucose, in addition to individual acids plus 0.4% w/v  
279 glucose. The pH of all solutions or NGY medium was adjusted using 1 M NaOH and 1 M HCl,  
280 as appropriate, to 4, 5, 6 or 7, and checked using a pH meter (Denver Instrument, Denver, CO,  
281 USA).

282

### 283 **Quantification of fermentation acids in gut bacterial culture supernatants using gas** 284 **chromatography**

285 The culture supernatants of the tested gut bacterial isolates were analysed by capillary gas  
286 chromatography (GC) to quantify the production of fermentation acids. To determine the  
287 concentrations of SCFAs and lactate, the samples were first derivatised as described elsewhere  
288 (Richardson *et al.* 1989). Briefly, 1 mL of a culture supernatant was placed in a Sorvall screw-

289 capped tube and 50  $\mu$ L of 0.1 M 2-ethylbutyric acid was added as an internal standard.  
290 Concentrations of derivatised fatty acids were determined after a double step extraction of  
291 organic acids in 0.5 mL of HCl and 2 mL of diethyl ether per sample, and quantification of  
292 their tertiary butyldimethylsilyl (*t*-BDMS) derivatives using capillary GC apparatus (Agilent  
293 6890; Agilent Technologies, Santa Clara). Two technical replicates of an external standard  
294 (acetic acid, propionic acid, iso-butyric acid, *n*-butyric acid, iso-valeric acid, *n*-valeric acid,  
295 sodium formate, lithium lactate, and sodium succinate) were analysed alongside the samples  
296 in each GC run to assess quality of the extraction.

297

## 298 **Statistical analyses**

299 The non-parametric Kruskal–Wallis test, followed by Dunn’s post-hoc test, were used to  
300 analyse data from assays on the inhibition of *C. albicans* growth by gut bacterial supernatants,  
301 and to compare *C. albicans* growth in the absence and presence of gut anaerobe supernatants,  
302 using Prism v8.4.1 (GraphPad, San Diego, CA, USA). To test for associations between percent  
303 *C. albicans* growth and the gut bacterial culture supernatants, a Spearman correlation was  
304 computed using Prism v8.4.1 (GraphPad). Exact P-values obtained using the Spearman  
305 correlation test were corrected using the two-stage linear step-up procedure of Benjamini,  
306 Krieger and Yekutieli (false discovery rate approach, with  $Q=5\%$ ). Parameters included the OD  
307 of microbial cultures, pH, and fermentation acid levels (acetate, formate, and lactate; separately  
308 and combined), as quantified in the culture supernatants using GC.

309

## 310 **RESULTS**

### 311 **Inhibitory activity of cultivated faecal microbiota on *Candida albicans* growth varies** 312 **between faecal donors**

313 To establish whether the gut microbiota from different individuals vary in their ability to

314 suppress the growth of *C. albicans*, we performed co-culturing experiments in batch culture,  
315 where *C. albicans* SC5314 cells were incubated for up to 48 h alongside faecal inocula from  
316 six healthy adults. The co-cultures were performed under anaerobic conditions in a complex  
317 growth medium designed to mimic the human colon environment. The viability of *C. albicans*  
318 cells was assessed by determining CFUs following plating onto SDA medium plus  
319 chloramphenicol at t=0 and after 24 h and 48 h incubation with or without homogenised faecal  
320 inocula.

321

322 An initial experiment was conducted with a stool sample from a single healthy volunteer  
323 (Donor 1). As shown in **Figure 1A**, the co-culture of *C. albicans* (inoculated at  $5 \times 10^5$  cells/ml)  
324 with faecal material from Donor 1 showed a clear reduction in the fungal CFUs after 44 h  
325 incubation. However, viable cell counts were also reduced at the end of the control incubation  
326 when *C. albicans* was grown alone (**Figure 1**, black lines), albeit the reduction was lower than  
327 that observed in co-culture. Subsequent experiments, assessing the impact of faecal inocula  
328 from five additional donors, were therefore performed using ten times more *C. albicans* cells  
329 (inoculated at  $5 \times 10^6$  cells/ml), which was sufficient to maintain significant *C. albicans* CFUs  
330 throughout the experiments (**Figure 1B**). In the control samples, without the faecal inoculum,  
331 *C. albicans* CFUs remained relatively constant throughout the 48 h incubation period, with  
332 counts around  $2.5 \times 10^6$  CFU/mL, indicating that the colon-mimicking growth medium and  
333 anaerobic conditions did not kill *C. albicans* (**Figure 1B**, black lines). The experiment also  
334 revealed that the faecal microbiota from different individuals affected *C. albicans* viable counts  
335 to markedly differing degrees after 44 h of co-culture (**Figure 1B**, orange, red, green, brown  
336 and blue lines). The faecal inoculum from Donor 5 resulted in the strongest inhibitory effect  
337 on *C. albicans* growth, with a 1000-fold (3-log) reduction of *Candida* CFUs at the end of the  
338 incubation period ( $1 \times 10^3$  CFU/mL). Co-cultures with faecal inocula from Donors 3, 4, and 6

339 also resulted in a decrease in *C. albicans* CFUs (between 4 and 20-fold decrease). In contrast,  
340 the faecal inoculum from Donor 2 resulted in no effect on *C. albicans* growth, which was  
341 comparable with that of the no faecal inoculum control, suggesting that the gut bacteria cultured  
342 from the faecal inoculum of this individual did not impair the fungal survival under the tested  
343 conditions. We conclude that the cultivated faecal samples from healthy individuals differed in  
344 their ability to inhibit the survival of *C. albicans*.

345

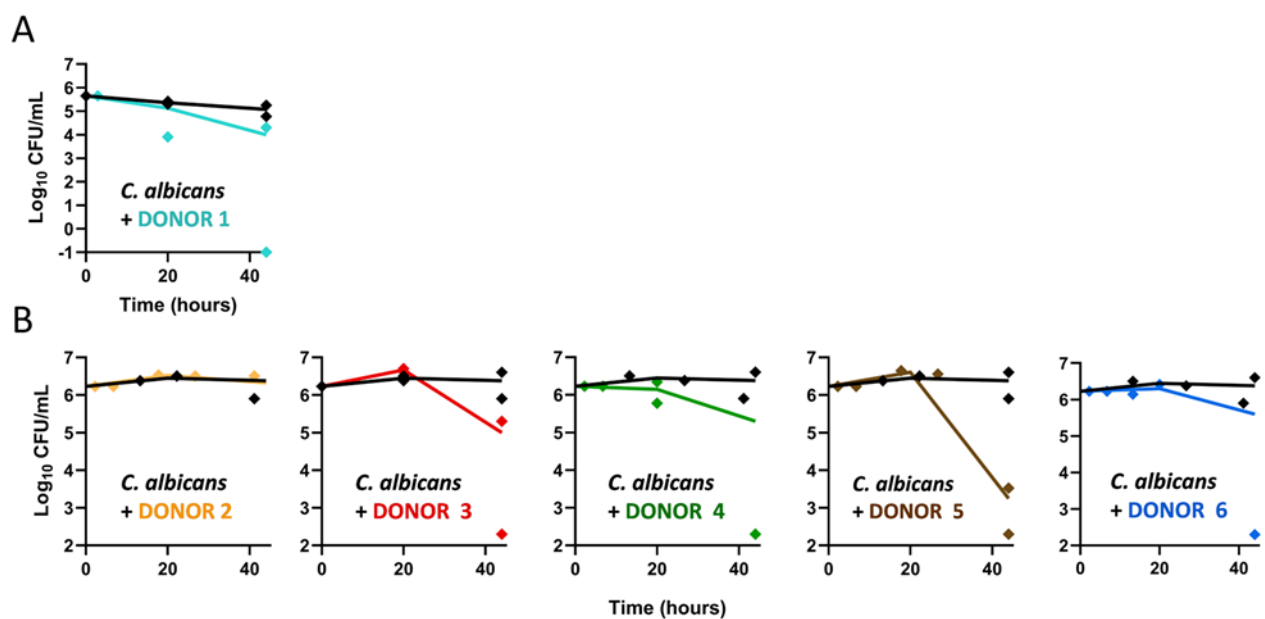

346

347 **Figure 1: Faecal inocula from healthy donors resulted in varying killing activity against *C.***  
348 ***albicans* cells *in vitro*.** *C. albicans* was cultured with faecal inocula from six different individuals  
349 (Donor 1 – 6), or with no faecal inocula as controls (black lines). Each data point (diamonds) represents  
350 *C. albicans* CFU/mL at sampled time points, while the line connects the means at each time point,  
351 calculated from two independent CFU measurements. Data were transformed to Log<sub>10</sub> (y-axis). A) *C.*  
352 *albicans* was inoculated into the anaerobic medium at a density of 5 x 10<sup>5</sup> cells/ml. B) *C. albicans* was  
353 inoculated into the anaerobic medium at a concentration of 5 x 10<sup>6</sup> cells/ml.

354

355 **Variance in faecal microbiota composition may impact colonisation resistance against *C.***

356 ***albicans***

357 The differing extent of inhibition of *C. albicans* growth observed in co-cultures with faecal  
358 inocula from different donors might result from differences in the cultured species composition  
359 and, consequently, their metabolic activities. Therefore, we used 16S rRNA gene-based  
360 sequence profiling to analyse the bacterial communities present in the initial faecal inocula  
361 from the different donors and in the co-culture batch samples after one and two days of  
362 incubation. The analysis revealed that, as anticipated, at the OTU level, the initial faecal  
363 inoculum samples contained the highest alpha diversity, which then became reduced as certain  
364 bacterial taxa were selectively enriched during co-incubation (**Figure 2A; Table**  
365 **S1\_Supplementary Data**).

366 We classified the cultured faecal samples into different groups according to the observed impact  
367 on *C. albicans* growth in the batch co-culture. Specifically, Donor 5 was defined as  
368 ‘antagonistic’ as the faecal inoculum from this donor resulted in the strongest inhibitory effect,  
369 as were Donors 1, 3, 4, and 6 (all >85% *C. albicans* inhibition). The Donor 2 inoculum was  
370 classified as ‘benign’ since co-incubation had comparatively little effect on *C. albicans* survival  
371 *in vitro* (12% inhibition).

372 The non-parametric analysis of molecular variance (AMOVA) test implemented in the Mothur  
373 software package (Schloss *et al.* 2009) was first used to compare the bacterial compositions of  
374 the cultivated benign and antagonistic samples (D2 v D1, 3, 4, 5, 6) at days one and two  
375 combined revealed a statistically significant difference between the two groups (P=0.02).

376 We next used LEfSe (Segata *et al.* 2011) to identify taxa that were associated with either the  
377 antagonistic (D1, 3, 4, 5, 6) or benign status (D2). The analysis indicated that the  
378 *Bifidobacteriaceae* family (P=0.032), and more specifically, *Bifidobacterium adolescentis*



379 (P=0.032) and *Bifidobacterium longum* derived OTUs (P=0.032) belonging to the Gram-  
380 positive *Actinobacteria* phylum correlated with samples exerting an antagonistic activity  
381 against *C. albicans* (Figure 2B; Tables S4 and S5\_Supplementary Data). In contrast, the  
382 *Coriobacteriaceae* family (P=0.032) and the constituent species *Collinsella aerofaciens*  
383 (P=0.026) (hereon indicated as *Co. aerofaciens*), also belonging to the *Actinobacteria* phylum,  
384 together with *Clostridiaceae* (P=0.031) and *Clostridium neonatale* (P=0.026) from the  
385 *Firmicutes* phylum, correlated with the lack of antagonistic activity against *C. albicans* (Figure  
386 2B, Tables S4 and S5\_Supplementary Data).

387

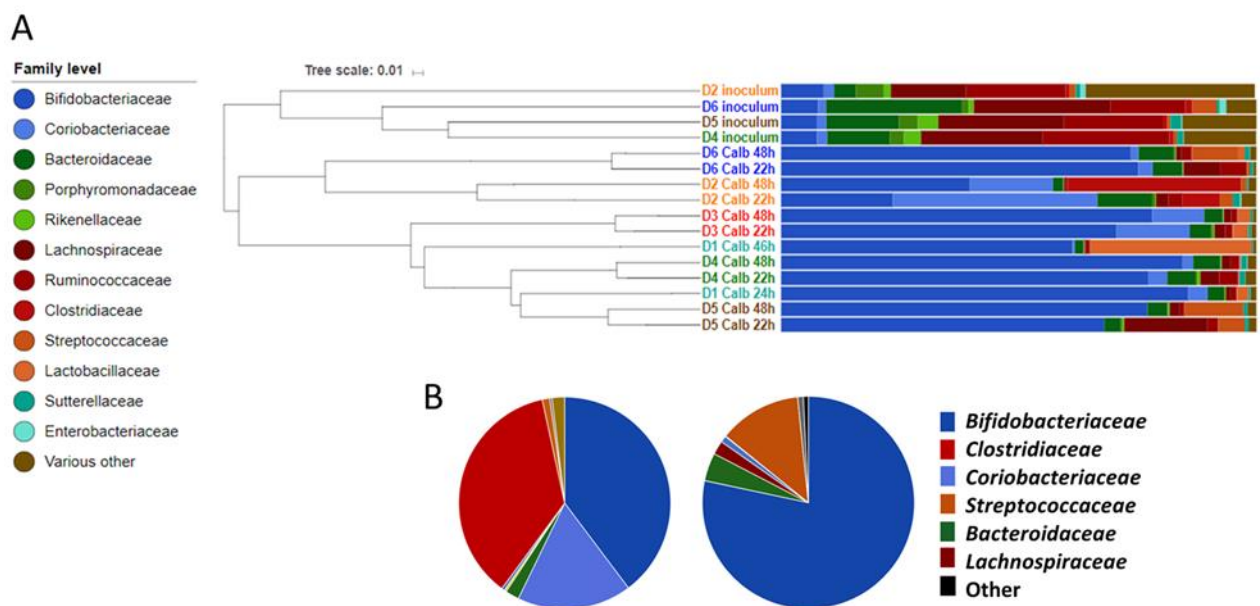

388

389 **Figure 2: Bacterial community analysis of faecal samples and co-cultures with varying inhibitory**  
390 **activity against *C. albicans*.** A) Bray-Curtis dendrogram of faecal inocula and subsequent co-cultures  
391 with *C. albicans*. B) Proportional family-level composition of Donor 2 (benign) and Donor 5  
392 (antagonistic) faecal samples after 48 h co-culture with *C. albicans* in anaerobic, colon-mimicking,  
393 medium.

394

395 **Culture supernatants of specific human gut isolates inhibit *C. albicans* growth under**  
396 **anaerobic conditions**

397 Having correlated the presence of bifidobacteria in the cultivated faecal samples with  
398 antagonistic activity against *C. albicans* using the 16S rRNA gene-based analysis, we next  
399 attempted to verify this finding by testing a panel of 37 common and dominant gut bacterial  
400 strains for inhibition of *C. albicans* growth *in vitro*. The species selected for these tests were  
401 representative of the main phyla inhabiting the human gut (**Table S2\_Supplementary Data**).  
402 The bacterial isolates of interest belonged to the phyla *Firmicutes* (nine strains belonging to  
403 the family *Lachnospiraceae*, four *Eubacteriaceae*, one *Peptostreptococcaceae*, three  
404 *Clostridiaceae*, six *Ruminococcaceae*, and one *Oscillospiraceae*), *Actinobacteria* (*B.*  
405 *adolescentis*, selected for analysis as this species was correlated with antagonist activity in co-  
406 culture with *C. albicans*, and two *Coriobacteriaceae*), *Bacteroidetes* (five *Bacteroidaceae*, one  
407 *Porphyromonadaceae*, and two *Prevotellaceae*) and one *Proteobacteria* (*Enterobacteriaceae*).  
408 A subset of the tested gut anaerobes was newly isolated for the purpose of this study from stool  
409 samples of healthy volunteers (see Materials and Methods section for details of isolation steps).  
410 We reasoned that the inhibitory effects of gut microbes upon *C. albicans* might be mediated, at  
411 least in part, by secreted factors or metabolites. Therefore, in order to assess the putative *in*  
412 *vitro* inhibitory activity of the selected gut bacterial isolates, each species (**Figure 3**) was grown  
413 individually in M2GSC liquid medium overnight. Then, filter-sterilised culture supernatant  
414 was incubated with an overnight liquid culture of *C. albicans* under anaerobic conditions for  
415 24 h. *C. albicans* biomass was assessed using optical density (OD<sub>600</sub>) measurements. The  
416 percentage growth of the fungus alone in fresh NGY medium, without exposure to bacterial  
417 supernatants, was set as 100% reference for each repeat run, and uninoculated M2GSC medium  
418 was used as a control.

419 The experiments revealed that the different supernatants varied widely in their effect on *C.*  
420 *albicans* growth (**Figure 3**). Compared to controls, most of the isolates tested, including *Co.*  
421 *aerofaciens* DSM 3979<sup>T</sup>, which was correlated with benign status in the earlier sequence-based  
422 profiling analysis, did not inhibit *C. albicans* growth. Of note, however, *Co. aerofaciens* strain  
423 DM124M showed a mild inhibitory effect ( $P < 0.01$ , **Figure 3**), suggesting that the activity  
424 observed may be strain specific. In contrast, the *Blautia wexlerae* D3M23, *Faecalitalea*  
425 *cylindroides* DM1E8M, *Prevotella copri* D3E4B, and *Intestinibacter bartlettii* 80/4 isolates  
426 showed more notable inhibitory effects (average inhibition in the range of 55–60%,  $P < 0.0001$ )  
427 and *B. adolescentis* L2-32 was identified as the strongest antagonist among all of the strains  
428 tested (63.6% average inhibition, **Figure 3**,  $P < 0.0001$ ). This was consistent with the 16S rRNA  
429 gene-based analysis described above, which had associated bifidobacteria with inhibition of *C.*  
430 *albicans* in the co-culture experiments. Incubation with the bacterial growth medium alone  
431 (M2GSC) appeared to promote the growth of *C. albicans* slightly, although the effect was not  
432 statistically significant (**Figure 3**), likely due to the presence of glucose in the medium, which  
433 *C. albicans* can use for growth.

434

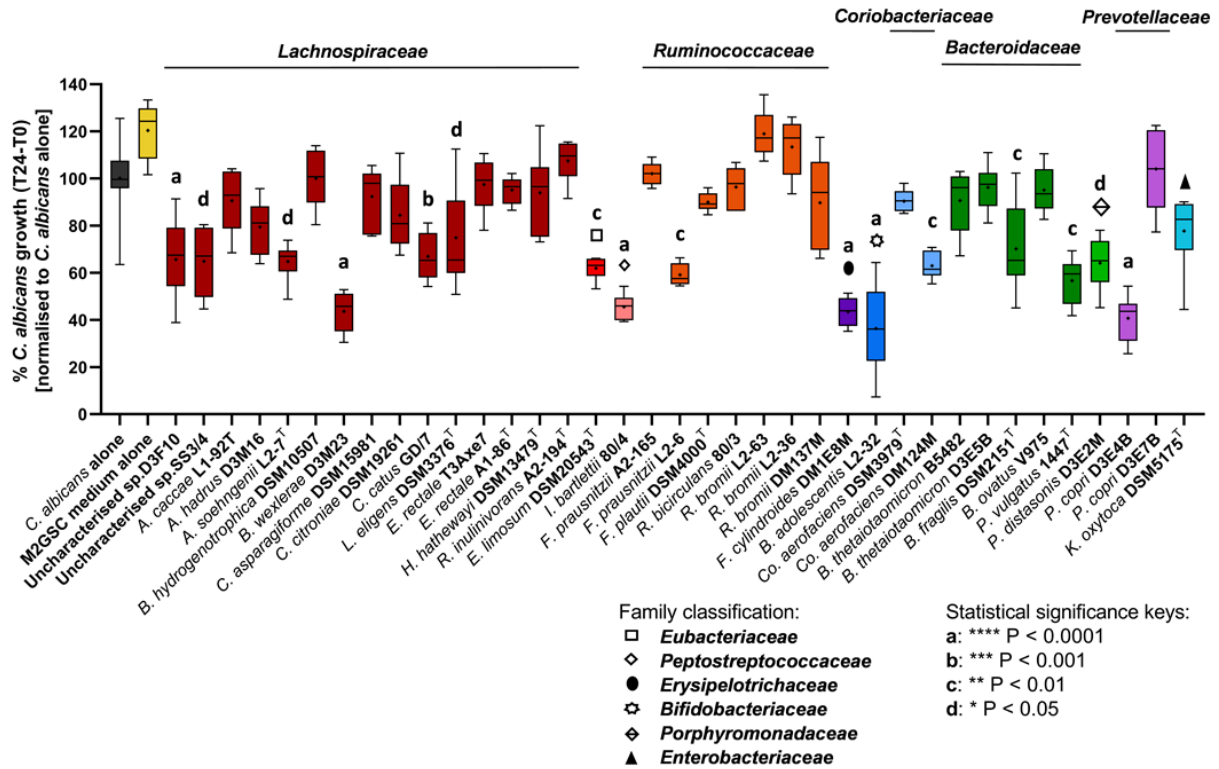

435

436 **Figure 3: Impact of culture supernatants from individual human gut anaerobe strains on *C.***

437 ***albicans* growth under anaerobic conditions.** The whisker boxplot represents percent *C. albicans*

438 growth (T24–T0) when incubated with pure culture supernatants from human gut isolates. The growth

439 of *C. albicans* alone in fresh NGY medium (black) was monitored via six technical replicates per test

440 (total n=54). Strains are grouped by family and colour-coded: dark red for *Lachnospiraceae*; red for

441 *Eubacteriaceae*; orange for *Ruminococcaceae*; purple for *Erysipelotrichia*; blue for *Bifidobacteriaceae*;

442 light blue for *Coriobacteriaceae*; green for *Bacteroidaceae*; light green for *Porphyromonadaceae*; lilac

443 for *Prevotellaceae*; and turquoise for *Enterobacteriaceae*. The cross represents the mean, while the

444 central horizontal line shows the median of six technical replicates per strain (except for

445 ‘Uncharacterised’ sp. D3F10, n=17; *Coprococcus catus* GD/7 and *Lachnospira eligens* DSM 3376<sup>T</sup>,

446 n=12; *R. bromii* DM137M, n=11; *B. adolescentis* L2-32, n=24; *Bacteroides fragilis* DSM 2151<sup>T</sup>, n=11).

447 The Kruskal–Wallis test revealed a highly significant difference between the effects of different

448 supernatants (P<0.0001), and Dunn’s post-hoc identified multiple gut anaerobes whose culture

449 supernatants significantly inhibited *C. albicans* growth compared to the *C. albicans*-only control, as

450 indicated in the figure.

451

452 Because of the strong inhibitory impact displayed by the *B. adolescentis* strain L2-32  
453 supernatant, combined with the previously identified correlation of this species with strong  
454 antagonism against *C. albicans* in the co-culture faecal incubation experiments described  
455 above, and the fact that this species is commonly detected in faeces from healthy adults  
456 (Matsuki *et al.* 2004), we next decided to focus on *Bifidobacterium* isolates and, in particular,  
457 on *B. adolescentis*, in more detail.

458

459 **Supernatants from specific *Bifidobacterium* strains inhibited *C. albicans* growth under**  
460 **anaerobic conditions**

461 To investigate whether different species of bifidobacteria inhibited the growth of *C. albicans*  
462 *in vitro*, four different bifidobacterial species, including one *B. animalis* strain, four *B.*  
463 *adolescentis*, two *B. bifidum*, and six *B. longum* strains, all isolated from the faeces of healthy  
464 adults (**Table S2\_Supplementary Data**), were screened for inhibition of *C. albicans* growth  
465 using the anaerobic assay described above. As *Co. aerofaciens* was correlated with benign  
466 effects on *C. albicans* in the faecal co-culture work, we also included supernatants from one  
467 strain of this species in these experiments for comparative purposes. The supernatants of all  
468 bifidobacteria species tested resulted in 20-80% *C. albicans* growth inhibition (relative to *C.*  
469 *albicans*-only growth in fresh NGY medium), except for *B. animalis* T1-817, which had no  
470 inhibitory activity (**Figure 4**). In agreement with the earlier experiments, supernatants from  
471 three out of four *B. adolescentis* strains (L2-32, L2-52, and L2-78) most strongly inhibited *C.*  
472 *albicans* growth ( $P < 0.001$ ; 68–78% fungal inhibition compared to the no supernatant controls)  
473 (**Figure 4**). In contrast, the type strain *B. adolescentis* DSM 20083<sup>T</sup> did not show a strong  
474 inhibitory effect, further indicating that the inhibitory activities may be strain-specific.  
475 Supernatants from *B. bifidum* T2-126 and T2-106 cultures were also significantly antagonistic

476 against *C. albicans* in the anaerobic assay ( $P < 0.01$  and  $P < 0.001$ , with 42–49% fungal growth  
477 inhibition compared to the control, respectively). Finally, all representatives of the *B. longum*  
478 species tested showed a consistent, non-significant, mild inhibitory effect of approximately 20–  
479 30% (Figure 4).

480

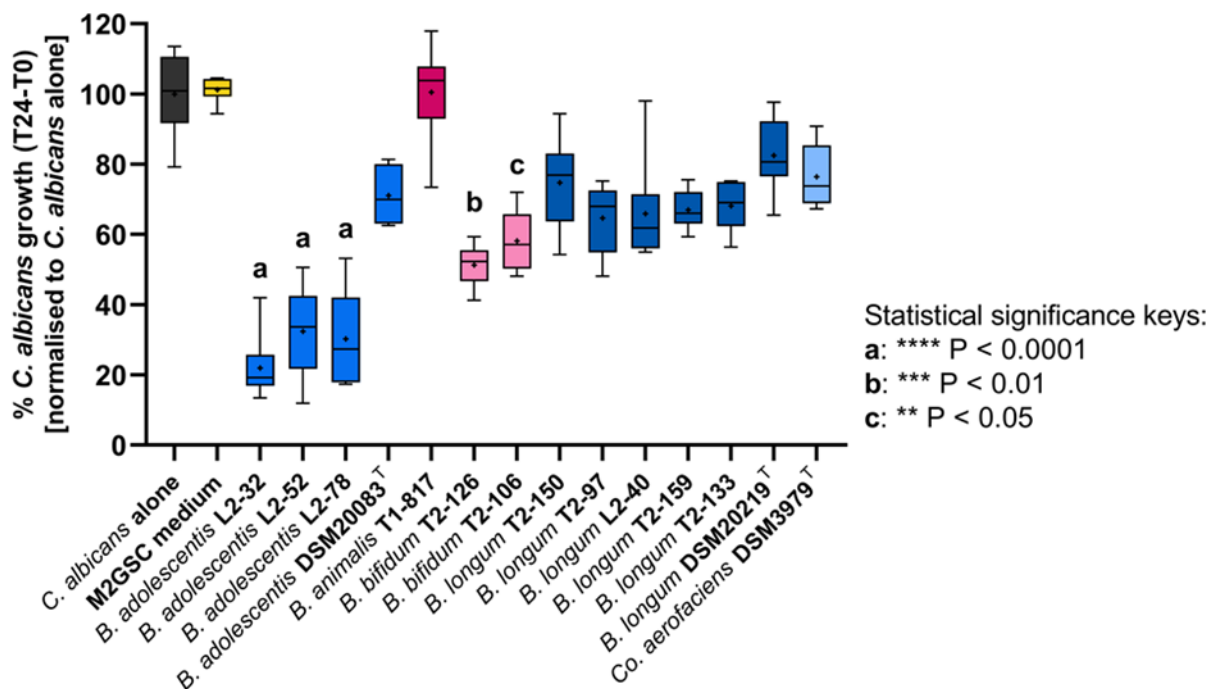

481

482 **Figure 4: Impact of bifidobacterial and *Co. aerofaciens* culture supernatants on *C. albicans***  
483 **growth under anaerobic conditions.** The whisker boxplot represents % *C. albicans* growth (T24–T0)  
484 after incubation with culture supernatants from *Bifidobacterium* spp. or *Co. aerofaciens* strains isolated  
485 from healthy human donors. The crosses and central horizontal lines represent the mean and median,  
486 respectively, of six technical replicates per strain or for the *C. albicans*-only control (black). Strains are  
487 colour-coded by species. The Kruskal–Wallis test revealed a highly significant difference between  
488 samples ( $P < 0.0001$ ), and Dunn’s post-hoc test identified specific bifidobacterial isolates that exerted a  
489 significant inhibitory effect on *C. albicans* growth compared to the control.

490

491

492 **The inhibitory activity of bifidobacterial supernatants on *C. albicans* growth correlated**  
493 **with fermentation acid production and acidic pH**

494 Having determined that culture supernatants from certain *Bifidobacterium* species from the  
495 human gut exert inhibitory activity against *C. albicans*, we next investigated the potential  
496 mechanisms underlying this phenomenon. As anticipated, quantification of the fermentation  
497 acids in the bifidobacterial supernatants used in the anaerobic assay revealed that the main  
498 organic acids produced by these strains were acetate, lactate, and formate (**Table**  
499 **S6\_Supplementary Data**). *B. adolescentis* L2-32 produced the highest levels of the  
500 fermentation acids (38.1 mM acetate, 9.9 mM lactate, and 4.2 mM formate), followed by *B.*  
501 *adolescentis* L2-52 (20.67 mM acetate, 8.2 mM lactate, and 4.69 mM formate), and *B.*  
502 *adolescentis* L2-78 (31.21 mM acetate, 11.42 mM lactate, and 6.23 mM formate) (**Table**  
503 **S6\_Supplementary Data**). The bifidobacterial strains producing the highest total  
504 concentrations of these fermentation acids therefore also displayed the strongest antagonistic  
505 activity against *C. albicans* (**Figure 5**). In contrast, we detected low concentrations of organic  
506 acids in non-inhibitory strain supernatants, such as those from *B. animalis* T1-817 and from  
507 the *B. longum* strains (**Table S6\_Supplementary Data**), suggesting that the inhibitory capacity  
508 of certain human gut bifidobacteria might be associated with the release of primary metabolites  
509 into the supernatant.

510 To assess whether the inhibitory activity observed in the anaerobic assay was associated with  
511 the production of fermentation acids, we performed Spearman's coefficient analysis by plotting  
512 the percent growth of *C. albicans* vs. the total amount of fermentation acids in the gut bacteria  
513 supernatants. We observed a strong positive correlation between total fermentation acid levels  
514 and fungal growth suppression ( $r=-0.82$ ) (**Figure 5A**). Similarly, we noted a strong negative

515 correlation between pH and *C. albicans* growth, with the lower pH correlating with reduced  
516 fungal growth ( $r=0.78$ ) (**Figure 5B**).

517

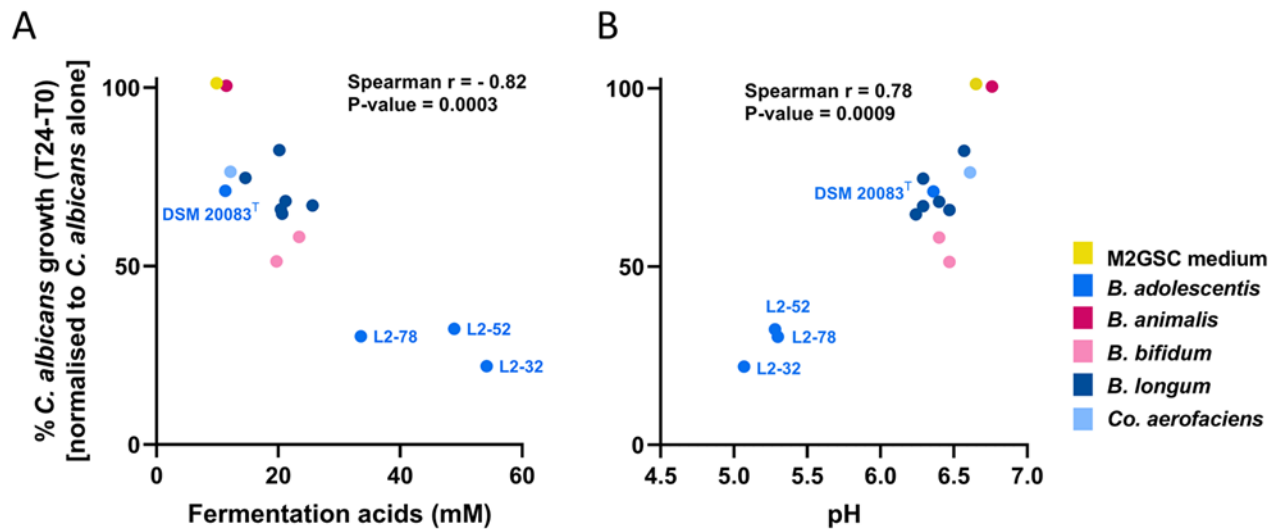

518

519 **Figure 5: The inhibitory effect of *Bifidobacterium* and *Collinsella aerofaciens* isolates positively**  
520 **correlated with total concentration of fermentation acids and lower supernatant pH.** Spearman  
521 correlation revealed that *C. albicans* inhibition was strongly associated with the fermentation acid  
522 concentration (A) and pH (B) of the bifidobacterial culture supernatants. Dots are colour-coded  
523 according to bacterial species, as per the key in the figure. P-values were corrected using the Benjamini,  
524 Krieger and Yekutieli false discovery rate approach.

525

526 We also calculated Spearman's correlation coefficients for the main individual fermentation  
527 acids produced by the *Bifidobacterium* strains (**Table S6\_Supplementary Data**). The analysis  
528 revealed that acetate, lactate, and formate concentrations were all significantly associated with  
529 *C. albicans* inhibition.

530 **Sensitivity of *C. albicans* to individual and combined fermentation acids, and pH**  
531 **extremes, under anaerobic growth conditions**

532 We next tested the effect of individual and mixed fermentation acid solutions, at concentrations



533 analogous to the previously observed highly inhibitory *B. adolescentis* supernatants (40–50  
534 mM acetate, 10–15 mM lactate, and 10 mM formate), on *C. albicans* growth in the anaerobic  
535 assay. The fermentation acid mixture containing acetate, lactate, and formate significantly  
536 reduced *C. albicans* growth compared to the control over the incubation period (mean fungal  
537 inhibition of 38%,  $P < 0.001$ ; **Figure 6A**). Similarly, the individual fermentation acids showed  
538 a consistent suppressive effect on *C. albicans* growth (mean fungal inhibition of approximately  
539 35% compared to controls), despite formate and lactate being added at lower concentrations  
540 than acetate (**Figure 6A**). This may be related to the fact that lactate and formate are stronger  
541 acids (pKa around 3.8) than acetate (pKa of 4.8). However, of note, the extent of inhibition  
542 exerted by the individual and mixed fermentation acid solutions was inferior to the impact on  
543 fungal growth displayed by *B. adolescentis* L2-32 supernatants in the same test (**Figure 6A**).  
544 This suggests the potential existence of additional inhibitory factors in the supernatant.

545

546 We then assessed the sensitivity of *C. albicans* to pH, by incubating in NGY culture medium  
547 adjusted to pH values ranging from 2 to 10. In contrast to the fermentation acids-based tests,  
548 pH values within the normal range of those detected in the lower gastrointestinal tract seemed  
549 to have little impact on *C. albicans* growth when tested as the sole variable (**Figure 6B**).  
550 Indeed, fungal growth was only significantly decreased at extreme pH values, particularly at  
551 pH 2 ( $P < 0.001$ ) and at pH 10 ( $P < 0.05$ ), compared to the fungal growth in unadjusted NGY  
552 medium (**Figure 6B**). This indicated that the suppression of *C. albicans* growth observed in  
553 the presence of culture supernatants is not driven solely by pH.

554

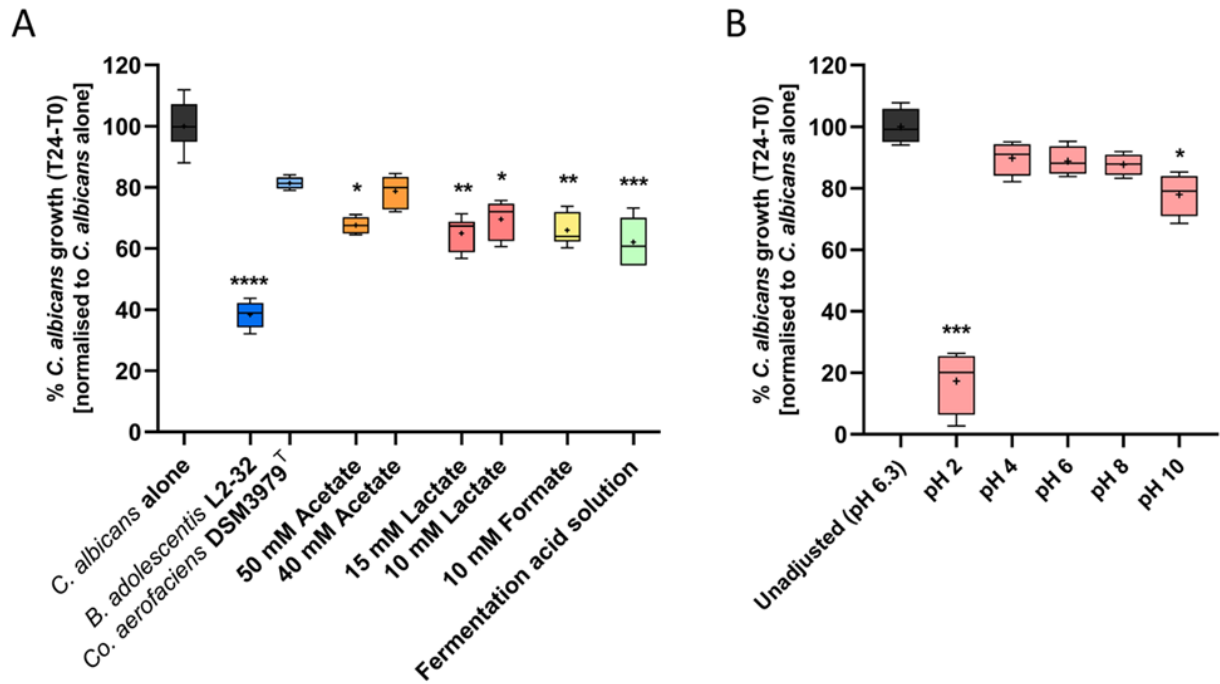

555

556 **Figure 6: Impact of single and combined fermentation acids, as well as pH, on *C. albicans* growth**

557 **under anaerobic conditions.** A) Individual fermentation acids and a mixed acid solution at

558 concentrations detected in the most inhibitory (*B. adolescentis* L2-32) supernatant (40 mM acetate, 10

559 mM lactate, and 10 mM formate) were tested for their impact on the growth of *C. albicans*. The whisker

560 boxplot includes the mean and median of six technical replicates as crosses and horizontal lines,

561 respectively. The Kruskal–Wallis test indicated strong differences between the observed values

562 ( $P < 0.0001$ ); Dunn's post hoc test revealed concentration-dependent inhibitory effects of the individual

563 fermentation acids, with a particularly strong effect of 15 mM lactate and 10 mM formate, compared to

564 the *C. albicans*-only control. B) Effect of pH on *C. albicans* growth, under anaerobic conditions. pH

565 values were adjusted by modifying NGY culture medium before filter-sterilisation. The whisker

566 boxplots show mean and median of four technical replicates. The Kruskal–Wallis test indicated

567 significant differences between the observed values ( $P = 0.0024$ ); Dunn's post hoc testing indicated

568 significant differences in fungal growth between the medium with unadjusted pH (pH 6.3, black), and

569 pH 2 and pH 10. Significance values: \*\*\*\*  $P < 0.0001$ , \*\*\*  $P < 0.001$ , \*\*  $P < 0.01$ , \*  $P < 0.05$ .

570

571

572 **Inhibition of *C. albicans* by bifidobacterial supernatants was mediated via the combined**  
573 **effects of pH and SCFAs**

574 To further uncover the mechanisms underpinning the inhibitory capacity of the *B. adolescentis*  
575 strains tested, we next set up an anaerobic assay to study the effect of the following individual  
576 stressors on *C. albicans* growth: pH alone, exposure to a mixed solution of fermentation acids  
577 (45 mM acetate, 15 mM lactate, and 10 mM formate, to mimic the concentrations determined  
578 in the most inhibitory (*B. adolescentis* L2-32) supernatant), and bacterial culture supernatants.  
579 To better understand the combinatorial role of fermentation acid concentration and pH, we  
580 conducted the tests at different controlled pH values, in the range from 4 to 7, adjusting either  
581 the medium, or the test solution/supernatant.

582

583 Consistent with the previous observations (**Figure 6**), *C. albicans* was highly resilient to the  
584 pH range tested under anaerobic conditions (**Figure 7**). Critically though, altering the pH  
585 significantly impacted the inhibitory activity of the tested supernatants, and the fermentation  
586 acids mix. In all cases, these treatments were most inhibitory at the lowest pH tested (pH 4),  
587 and progressively lost potency against *C. albicans* as the pH increased (**Figure 7**). This  
588 indicated that pH and fermentation acids combine to produce an inhibitory effect on *C.*  
589 *albicans*.

590

591 Of note, the antagonistic effect of the *B. adolescentis* L2-32 supernatant was significantly more  
592 pronounced than that of the SCFA solution at pH 5, as well as to that of a solution with an  
593 unadjusted pH value (**Figure 7**), again suggesting that the bacterial supernatant might contain  
594 additional inhibitory factors.

595

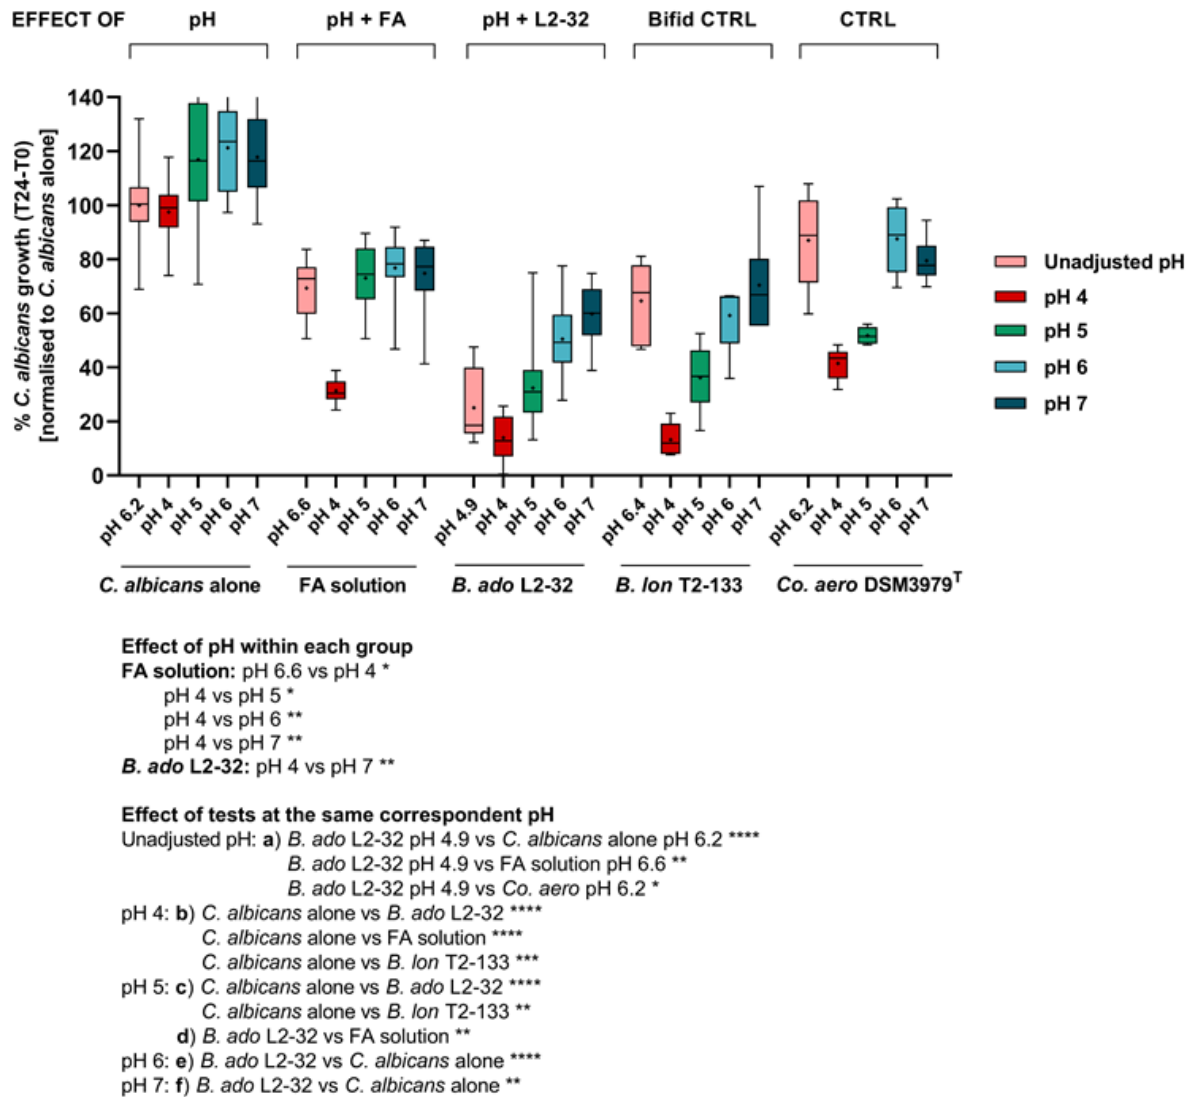

596

597 **Figure 7: Cumulative impact of pH and fermentation acids (FA) on *C. albicans* growth under**

598 **anaerobic conditions.** The whisker boxplot shows *C. albicans* growth when tested at different

599 controlled pH values, adjusting either the medium or the test solution/supernatant in the range from pH

600 4 to 7, under anaerobic conditions. Crosses and central horizontal lines represent the mean and median,

601 respectively, of 12 technical replicates per test (n=32 for *C. albicans* alone at pH 6.2, n=18 for FA

602 solution at all tested pH values, n=24 for both *B. adolescentis* L2-32 and *Co. aerofaciens* DSM 3979<sup>T</sup>

603 at all tested pH values). The Kruskal–Wallis test indicated highly significant differences between groups

604 (P<0.0001); Dunn’s post-hoc test, comparing the observations against each other, indicated significant

605 differences within each group at different pH values (colour-coded as per legend) and between groups

606 at the same corresponding pH, indicated separately in the Figure legend as ‘effect of pH’ and ‘effect of

607 tests at the same correspondent pH', respectively. Significance: \*\*\*\* P<0.0001, \*\*\* P<0.001, \*\* P  
608 <0.01, \* P<0.05. B. ado, *B. adolescentis*; B. lon, *B. longum*.

609

## 610 **DISCUSSION**

611 *C. albicans* is a major clinical challenge because of high mortality in susceptible patients,  
612 emerging resistance against antifungal and sanitising agents, and the limited availability of  
613 additional therapeutic options (Pfaller *et al.* 2000). Alternative strategies to reduce carriage and  
614 dissemination of *C. albicans* in the gut should therefore be explored. The healthy intestinal  
615 microbiota is an appealing source of novel treatments, considering the well-established role it  
616 plays in protecting against systemic candidiasis, by hindering fungal expansion and pathogenic  
617 initiation in the gut (Kennedy and Volz 1985a, 1985b). However, the gut microbiota is  
618 extremely complex and it is currently largely unknown which components are most likely to  
619 be potent inhibitors of *C. albicans* in the gut. We demonstrate here that *B. adolescentis* culture  
620 supernatants exert strong inhibitory activity against *C. albicans* under anaerobic conditions *in*  
621 *vitro*, and identified an inhibitory effect of secreted bacterial fermentation acids and prevailing  
622 pH on *C. albicans* growth. These observations were in agreement with our DNA sequence-  
623 based analysis correlating the presence of *B. adolescentis* with the inhibition of *C. albicans* in  
624 mixed co-culture with faecal microbiota samples, under conditions mimicking the human  
625 colonic environment.

626

627 The *Bifidobacterium* genus is dominant in the colon of breast-fed infants (Yatsunenکو *et al.*  
628 2012; Khonsari *et al.* 2016) and it accounts for approximately 5% of the microbiota in adults,  
629 of which the species *B. adolescentis* is a prevalent representative (Reuter 1963). Importantly,  
630 *B. adolescentis* is also enriched following consumption of resistant starch (Ze *et al.* 2012), and  
631 produces high amounts of organic acids as a result of carbohydrate fermentation (**Table**

632 **S6\_Supplementary Data**). Despite the relatively low proportional abundance of this genus in  
633 the total microbiota in adults, it has potential health benefits for the host (Rossi *et al.* 2005;  
634 Fukuda *et al.* 2011; Rivière *et al.* 2014). Aside from fermentation acid production,  
635 bifidobacteria have also been demonstrated to induce the anti-inflammatory cascade (Lammers  
636 *et al.* 2003; Meng *et al.* 2016), and improve colonisation resistance against common food-borne  
637 pathogens such as *E. coli* O157:H7 and *Salmonella enterica* serovar Typhimurium (Makras  
638 and De Vuyst 2006; Fukuda *et al.* 2011; Ventura *et al.* 2016). In addition, *B. adolescentis*  
639 colonises the epithelial mucus layer and may therefore out-compete pathogens for adhesion  
640 sites on the gut epithelium (Tan *et al.* 2016; Ventura *et al.* 2016), potentially reducing the  
641 biofilm formation that can be an important virulence factor in *C. albicans* (Gulati and Nobile  
642 2016).

643  
644 Importantly, bifidobacteria were also recently predicted as major antagonists against *C.*  
645 *albicans* in an *in silico* model of inter-microbial interactions in the human gut (Mirhakkak *et*  
646 *al.* 2020). Bifidobacteria such as *B. adolescentis* may therefore be promising candidates for  
647 novel microbiota-based therapeutics aimed at enhancing colonisation resistance. Several  
648 clinical trials have reported some efficacy of probiotic supplementation of *Bifidobacterium* and  
649 *Lactobacillus* spp. in reducing *C. albicans* intestinal colonisation and preventing invasive  
650 fungal sepsis in infants following antibiotic treatment (Romeo *et al.* 2011; Roy *et al.* 2014).  
651 Furthermore, because *B. adolescentis* is a common member of the adult gut microbiota (present  
652 in up to 83% of healthy adults) (Matsuki *et al.* 1999; Junick and Blaut 2012) and responds to  
653 changes in the diet, the growth and metabolic activities of this species could potentially be  
654 modulated *in vivo* by prebiotic supplementation.

655 Aside from bifidobacteria, other gut bacterial taxa are also likely worthy of further study. For  
656 example, we also observed inhibitory effects against *C. albicans* by a number of other gut

657 bacterial species (**Figure 3**). Wider screening of gut bacterial isolates is therefore highly likely  
658 to identify additional candidates with anti-*Candida* activity. In contrast, we also identified  
659 bacterial supernatants with little effect on *C. albicans* growth, such as those derived from  
660 *Flavonifractor plautii* and *Hungatella hathewayi*. This is consistent with reports that the  
661 relative abundances of these two bacterial species are correlated with *C. albicans* levels in  
662 faecal samples from cancer patients (Mirhakkak *et al.* 2020). Our results also highlight that  
663 different strains of the same gut bacterial species may have varying impacts on *C. albicans*  
664 growth (**Figure 3**). Better understanding of the mechanistic basis for some of the putative  
665 interactions, both beneficial and detrimental, between specific gut bacteria and *C. albicans* may  
666 help to prioritise candidates for development as novel therapeutics.

667  
668 A key mechanistic result of the current study is demonstrating the combinatorial effect of  
669 fermentation acids and pH on the growth of *C. albicans*. Our findings are consistent with  
670 previous work indicating that the protonated form of weak acids freely permeate and  
671 accumulate inside microbial cells, causing dissipation of the proton motive force (Axe and  
672 Bailey 1995), triggering energetically expensive stress responses (Henriques, Quintas and  
673 Loureiro-Dias 1997), and perturbation of essential metabolic reactions (Cottier *et al.* 2015;  
674 Lourenço *et al.* 2018). Bacterial fermentation acids are therefore thought to play important  
675 roles in limiting *C. albicans* intestinal colonisation *in vivo* (Huang *et al.* 2011; Guinan *et al.*  
676 2019), and a decrease in caecal SCFA concentrations following antibiotic treatment is  
677 associated with increased *C. albicans* load in the faeces in mouse models (Bohnhoff, Miller  
678 and Martin 1964; Guinan *et al.* 2019).

679 In agreement with our observations presented here, *C. albicans* was shown to be susceptible to  
680 formate (Mirhakkak *et al.* 2020) and acetate, at concentrations of over 30 mM, *in vitro*, and the  
681 effect is aggravated by microaerophilic conditions (Lourenço *et al.* 2018). Further, acetate

682 inhibits hyphal morphogenesis of *C. albicans*, which is required for fungal translocation  
683 through the epithelial barrier (Guinan *et al.* 2019). In contrast, previous work has shown that  
684 lactate does not impair fungal growth at concentrations tested in our study, even at low pH  
685 values, and under aerophilic/microaerophilic conditions (Lourenço *et al.* 2018). Indeed, lactate  
686 is a potential energy source of *C. albicans* under hypoxic conditions, and is known to induce  
687 sustained fungal resistance to osmotic and cell wall stress, via cell wall remodelling (Ene *et al.*  
688 2012b, 2012a, 2015). Nonetheless, substantial lactate release (up to approximately 110 mM),  
689 among other factors, is postulated to contribute to lactic acid bacteria-mediated colonisation  
690 resistance to *C. albicans* in the vaginal tract (Köhler, Assefa and Reid 2012; Zangl *et al.* 2020).  
691  
692 Importantly, the total fermentation acid and acetate concentrations that *C. albicans* cells were  
693 exposed to in this study are physiologically relevant for regions of the human gastrointestinal  
694 tract such as the proximal colon (Cummings and Macfarlane 1991). Indeed, total SCFA levels  
695 may reach up to 200 mM in the proximal colon (Cummings and Macfarlane 1991), suggesting  
696 that inhibition of *C. albicans* growth mediated by total fermentation acids may be greater than  
697 indicated by our study, and may represent a key mechanism of colonisation resistance to this  
698 opportunistic fungus. In contrast, the concentrations of formate and lactate detected here in the  
699 bifidobacterial culture supernatants appear to be slightly higher than those detected in human  
700 faecal samples, where they do not usually exceed 5–10 mM, as they are absorbed by the host  
701 or utilised by other bacteria (Hove, Norgard Andersen and Mortensen 1994; Duncan *et al.*  
702 2007). Additionally, the finding that supernatants were often more inhibitory than defined  
703 fermentation acid mixtures (**Figures 6 and 7**) suggests that additional anti-fungal substances  
704 may be produced by some gut anaerobes. This may be a worthwhile avenue for further study.  
705



## 706 CONCLUSIONS

707 In this *in vitro* study we identified specific components of the human gut microbiota, *B.*  
708 *adolescentis* in particular, as antagonistic against *C. albicans*. Inhibitory activity was  
709 predominantly driven by the release of fermentation acids, and the subsequent drop in ambient  
710 pH. The potential for altering the gut microbiota composition, for example by consumption of  
711 probiotics such as *B. adolescentis*, or increasing *in vivo* SCFA concentrations by consumption  
712 of dietary fibres such as resistant starch, are worthy of further study to determine whether these  
713 can bolster colonisation resistance against *C. albicans* in the gut.

714

## 715 DECLARATIONS

716 **Competing interests:** The authors have no conflicts of interest to declare.

717 **Funding:** Initial studies were funded from a Wellcome Institutional Strategic Support Fund  
718 (ISSF) Seed Corn Award [105625/Z/14/Z]. Thereafter, the research was funded by the Scottish  
719 Government's Rural and Environment Science and Analytical Services (RESAS) division.

720 **Authors' contributions:** AWW, SHD, AJPB, and MDL conceived of the research and  
721 designed the experiments. JM, GED, and AC carried out the batch co-culture experiment and  
722 analysed the resulting data. LR performed the rest of the experiments and analysed the data.  
723 KM and LR isolated novel gut bacterial strains that were used in these experiments. LR, SHD,  
724 and AWW wrote the manuscript. All authors read and approved the final manuscript.

725 **Acknowledgements:** We thank Dr Donna M. MacCallum for critical reading of the  
726 manuscript, the Centre for Genome-Enabled Biology and Medicine at the University of  
727 Aberdeen for carrying out the 16S rRNA gene sequencing, and Donna Henderson for GC  
728 analysis of bacterial fermentation acids. The authors also acknowledge the support of the  
729 Maxwell computer cluster funded by the University of Aberdeen.

730 **REFERENCES**

731

732 Axe D, Bailey J. Transport of lactate and acetate through the energized cytoplasmic membrane  
733 of *Escherichia coli*. *Biotechnol Bioeng* 1995;**47**:8–19.

734 Barcenilla A, Pryde SE, Martin JC *et al*. Phylogenetic relationships of butyrate-producing  
735 bacteria from the human gut. *Appl Environ Microbiol* 2000;**66**:1654–61.

736 Bernalier A, Willems A, Leclerc M *et al*. *Ruminococcus hydrogenotrophicus* sp. nov., a new  
737 H<sub>2</sub>CO<sub>2</sub>-utilizing acetogenic bacterium isolated from human feces. *Arch Microbiol*  
738 1996;**166**:176–83.

739 Bohnhoff M, Miller CP, Martin WR. Resistance of the mouse's intestinal tract to experimental  
740 *Salmonella* infection. Factors which interfere with the initiation of infection by oral  
741 inoculation. *J Exp Med* 1964;**120**:805–16.

742 Brown GD, Denning DW, Gow NAR *et al*. Hidden Killers: Human Fungal Infections. *Sci*  
743 *Transl Med* 2012;**4**:165–78.

744 Bryant MP. Commentary on the Hungate technique for culture of anaerobic bacteria. *Am J Clin*  
745 *Nutr* 1972;**25**:1324–8.

746 Buffie CG, Bucci V, Stein RR *et al*. Precision microbiome reconstitution restores bile acid  
747 mediated resistance to *Clostridium difficile*. *Nature* 2015;**517**:205–8.

748 Carroll IM, Ringel-Kulka T, Siddle JP *et al*. Alterations in composition and diversity of the  
749 intestinal microbiota in patients with diarrhea-predominant irritable bowel syndrome.  
750 *Neurogastroenterol Motil* 2012;**24**:521-30

751 Cash HL, Whitham C V, Behrendt CL *et al*. Symbiotic bacteria direct expression of an intestinal  
752 bactericidal lectin. *Science* 2006;**313**:1126–30.

753 Cherrington CA, Hinton M, Pearson GR *et al*. Short-chain organic acids at pH 5.0 kill  
754 *Escherichia coli* and *Salmonella* spp. without causing membrane perturbation. *J Appl*

- 755 *Bacteriol* 1991;**70**:161–5.
- 756 Cole JR, Wang Q, Fish JA *et al*. Ribosomal Database Project: data and tools for high throughput  
757 rRNA analysis. *Nucleic Acids Res* 2014;**42**.
- 758 Cottier F, Tan ASM, Chen J *et al*. The transcriptional stress response of *Candida albicans* to  
759 weak organic acids. *G3 (Bethesda)* 2015;**5**:497–505.
- 760 Cummings JH. Short chain fatty acids in the human colon. *Gut* 1981;**22**:763–79.
- 761 Cummings JH, Macfarlane GT. The control and consequences of bacterial fermentation in the  
762 human colon. *J Appl Bacteriol* 1991;**70**:443–59.
- 763 d’Enfert C, Kaune A-K, Alaban L-R *et al*. The impact of the Fungus-Host-Microbiota interplay  
764 upon *Candida albicans* infections: current knowledge and new perspectives. *FEMS*  
765 *Microbiol Rev* 2020;**45**: fuaa060
- 766 Deriu E, Liu JZ, Pezeshki M *et al*. Probiotic bacteria reduce *Salmonella* Typhimurium intestinal  
767 colonization by competing for iron. *Cell Host Microbe* 2013;**14**:26–37.
- 768 Donia MS, Fischbach MA. Small molecules from the human microbiota. *Science (80- )*  
769 2015;**116**:1477–90.
- 770 Duncan SH, Barcenilla A, Stewart CS *et al*. Acetate utilization and butyryl coenzyme A  
771 (CoA):acetate-CoA transferase in butyrate-producing bacteria from the human large  
772 intestine. *Appl Environ Microbiol* 2002;**68**:5186–90.
- 773 Duncan SH, Belenguer A, Holtrop G *et al*. Reduced dietary intake of carbohydrates by obese  
774 subjects results in decreased concentrations of butyrate and butyrate-producing bacteria  
775 in feces. *Appl Environ Microbiol* 2007;**73**:1073–8.
- 776 Duncan SH, Louis P, Thomson JM *et al*. The role of pH in determining the species composition  
777 of the human colonic microbiota. *Environ Microbiol* 2009;**11**:2112–22.
- 778 Eggerth AH. The Gram-positive Non-spore-bearing Anaerobic Bacilli of Human Feces. *J*  
779 *Bacteriol* 1935;**30**:277–99.

- 780 Eggerth AH, Gagnon BH. The Bacteroides of Human Feces. *J Bacteriol* 1933;**25**:389–413.
- 781 Ene I V., Adya AK, Wehmeier S *et al.* Host carbon sources modulate cell wall architecture,  
782 drug resistance and virulence in a fungal pathogen. *Cell Microbiol* 2012a;**14**:1319–35.
- 783 Ene I V., Heilmann CJ, Sorgo AG *et al.* Carbon source-induced reprogramming of the cell wall  
784 proteome and secretome modulates the adherence and drug resistance of the fungal  
785 pathogen *Candida albicans*. *Proteomics* 2012b;**12**:3164–79.
- 786 Ene I V., Walker LA, Schiavone M *et al.* Cell wall remodeling enzymes modulate fungal cell  
787 wall elasticity and osmotic stress resistance. *MBio* 2015;**6**:e00986.
- 788 Fan D, Coughlin LA, Neubauer MM *et al.* Activation of HIF-1 $\alpha$  and LL-37 by commensal  
789 bacteria inhibits *Candida albicans* colonization. *Nat Med* 2015;**21**:808–14.
- 790 Flint HJ, Duncan SH, Scott KP *et al.* Links between diet, gut microbiota composition and gut  
791 metabolism. *Proc Nutr Soc* 2015;**74**:13–22.
- 792 Flugge C. Die Microorganismen. *FCW Vogel, Leipzig* 1886.
- 793 Freter R, Brickner H, Botney M *et al.* Mechanisms That Control Bacterial Populations in  
794 Continuous-Flow Culture Models of Mouse Large Intestinal Flora. *Infect Immun*  
795 1983;**39**:676-85.
- 796 Fukuda S, Toh H, Hase K *et al.* Bifidobacteria can protect from enteropathogenic infection  
797 through production of acetate. *Nature* 2011;**469**:543–7.
- 798 Gammelsrud KW, Sandven P, Høiby EA *et al.* Colonization by *Candida* in children with cancer,  
799 children with cystic fibrosis, and healthy controls. *Clin Microbiol Infect* 2011;**17**:1875–  
800 81.
- 801 Geirnaert A, Calatayud M, Grootaert C *et al.* Butyrate-producing bacteria supplemented *in vitro*  
802 to Crohn's disease patient microbiota increased butyrate production and enhanced  
803 intestinal epithelial barrier integrity. *Nature* 2017;**7**:11450.
- 804 Gillum A, Tsay E, Kirsch D. Isolation of the *Candida albicans* gene for orotidine-5'-phosphate

- 805 decarboxylase by complementation of *S. cerevisiae* *ura3* and *E. coli* *pyrF* mutations. *Mol*  
806 *Gen Genet* 1984;**198**:179–82.
- 807 Guinan J, Wang S, Hazbun TR *et al.* Antibiotic-induced decreases in the levels of microbial-  
808 derived short-chain fatty acids correlate with increased gastrointestinal colonization of  
809 *Candida albicans*. *Sci Rep* 2019;**9**:1–11.
- 810 Guinea J. Global trends in the distribution of *Candida* species causing candidemia. *Clin*  
811 *Microbiol Infect* 2014;**20**:5–10.
- 812 Gulati M, Nobile CJ. *Candida albicans* biofilms: development, regulation, and molecular  
813 mechanisms. *Microbes Infect* 2016;**18**:310–21.
- 814 Hahnke RL, Meier-Kolthoff JP, García-López M *et al.* Genome-based taxonomic classification  
815 of *Bacteroidetes*. *Front Microbiol* 2016;**7**:2003.
- 816 Harnett J, Myers SP, Rolfe M. Significantly higher faecal counts of the yeasts *Candida* and  
817 *Saccharomyces* identified in people with coeliac disease. *Gut Pathog* 2017;**9**:26.
- 818 Heaney H, Laing J, Paterson L *et al.* The environmental stress sensitivities of pathogenic  
819 *Candida* species, including *Candida auris*, and implications for their spread in the hospital  
820 setting. *Med Mycol* 2020;**58**:744–55.
- 821 Henriques M, Quintas C, Loureiro-Dias M. Extrusion of benzoic acid in *Saccharomyces*  
822 *cerevisiae* by an energy-dependent mechanism. *Microbiology* 1997;**143**:1877–83.
- 823 Hobson PN. Rumen bacteria. *Methods Microbiol* 1969;**3B**:133–149.
- 824 Holdeman L V., Moore WEC. New genus, *Coprococcus*, twelve new species, and emended  
825 descriptions of four previously described species of bacteria from human feces. *Int J Syst*  
826 *Bacteriol* 1974;**24**:260–77.
- 827 Hove H, Norgard Andersen I, Mortensen PB. Fecal DL-lactate concentrations in 100  
828 gastrointestinal patients. *Scand J Gastroenterol* 1994;**29**:255–9.
- 829 Huang CB, Alimova Y, Myers TM *et al.* Short- and medium-chain fatty acids exhibit

- 830 antimicrobial activity for oral microorganisms. *Arch Oral Biol* 2011;**56**:650–4.
- 831 Hube B. From commensal to pathogen: stage- and tissue-specific gene expression of *Candida*  
832 *albicans*. *Curr Opin Microbiol* 2004;**7**:336–41.
- 833 Johnson M, Zaretskaya I, Raytselis Y *et al*. NCBI BLAST: a better web interface. *Nucleic Acids*  
834 *Res* 2008;**36**:W5-9.
- 835 Junick J, Blaut M. Quantification of human fecal *Bifidobacterium* species by use of quantitative  
836 real-time PCR analysis targeting the groEL gene. *Appl Environ Microbiol* 2012;**78**:2613–  
837 22.
- 838 Kau AL, Ahern PP, Griffin NW *et al*. Human nutrition, the gut microbiome and the immune  
839 system. *Nature* 2011;**474**:327–36.
- 840 Kennedy MJ, Volz PA. Ecology of *Candida albicans* gut colonization: Inhibition of *Candida*  
841 adhesion, colonization, and dissemination from the gastrointestinal tract by bacterial  
842 antagonism. *Infect Immun* 1985a;**49**:654–63.
- 843 Kennedy MJ, Volz PA. Effect of various antibiotics on gastrointestinal colonization and  
844 dissemination by *Candida albicans*. *Sabouraudia* 1985b;**23**:265–73.
- 845 Khonsari S, Suganthi M, Burczynska B *et al*. A comparative study of bifidobacteria in human  
846 babies and adults. *Biosci microbiota, food Heal* 2016;**35**:97–103.
- 847 Koh A, De Vadder F, Kovatcheva-Datchary P *et al*. From Dietary Fiber to Host Physiology:  
848 Short-Chain Fatty Acids as Key Bacterial Metabolites. *Cell* 2016;**165**:1332–45.
- 849 Köhler GA, Assefa S, Reid G. Probiotic interference of *Lactobacillus rhamnosus* GR-1 and  
850 *Lactobacillus reuteri* RC-14 with the opportunistic fungal pathogen *Candida albicans*.  
851 *Infect Dis Obstet Gynecol* 2012;**2012**:636474.
- 852 Lammers KM, Brigidi P, Vitali B *et al*. Immunomodulatory effects of probiotic bacteria DNA:  
853 IL-1 and IL-10 response in human peripheral blood mononuclear cells. *FEMS Immunol*  
854 *Med Microbiol* 2003;**38**:165–72.

- 855 León C, Alvarez-Lerma F, Ruiz-Santana S *et al.* Fungal colonization and/or infection in non-  
856 neutropenic critically ill patients: results of the EPCAN observational study. *Eur J Clin*  
857 *Microbiol Infect Dis* 2009;**28**:233–42.
- 858 Lourenço A, Pedro NA, Salazar SB *et al.* Effect of Acetic Acid and Lactic Acid at Low pH in  
859 Growth and Azole Resistance of *Candida albicans* and *Candida glabrata*. *Front*  
860 *Microbiol* 2018;**9**:3265.
- 861 Low CY, Rotstein C. Emerging fungal infections in immunocompromised patients. *F1000 Med*  
862 *Rep* 2011;**3**:14.
- 863 MacCallum DM, Findon H, Kenny CC *et al.* Different Consequences of ACE2 and SWI5 Gene  
864 Disruptions for Virulence of Pathogenic and Nonpathogenic Yeasts. *Infect Immun*  
865 2006;**74**:5244–8.
- 866 Makras L, De Vuyst L. The in vitro inhibition of Gram-negative pathogenic bacteria by  
867 bifidobacteria is caused by the production of organic acids. *Int Dairy J* 2006;**16**:1049–57.
- 868 Maltby R, Leatham-Jensen MP, Gibson T *et al.* Nutritional Basis for Colonization Resistance  
869 by Human Commensal *Escherichia coli* Strains HS and Nissle 1917 against *E. coli*  
870 O157:H7 in the Mouse Intestine. *PLoS One* 2013;**8**:e53957.
- 871 Marteyn B, Scorza FB, Sansonetti PJ *et al.* Breathing life into pathogens: the influence of  
872 oxygen on bacterial virulence and host responses in the gastrointestinal tract. *Cell*  
873 *Microbiol* 2011;**13**:171–6.
- 874 Martinez-Medina M, Denizot J, Dreux N *et al.* Western diet induces dysbiosis with increased  
875 *E. coli* in CEABAC10 mice, alters host barrier function favouring AIEC colonisation. *Gut*  
876 2014;**63**:116–24.
- 877 Mason KL, Downward JRE, Mason KD *et al.* *Candida albicans* and bacterial microbiota  
878 interactions in the cecum during recolonization following broad-spectrum antibiotic  
879 therapy. *Infect Immun* 2012;**80**:3371–80.

- 880 Matsuki T, Watanabe K, Fujimoto J *et al.* Quantitative PCR with 16S rRNA-gene-targeted  
881 species-specific primers for analysis of human intestinal bifidobacteria. *Appl Environ*  
882 *Microbiol* 2004;**70**:167–73.
- 883 Matsuki T, Watanabe K, Tanaka R *et al.* Distribution of bifidobacterial species in human  
884 intestinal microflora examined with 16S rRNA-gene-targeted species-specific primers.  
885 *Appl Environ Microbiol* 1999;**65**:4506–12.
- 886 Meng D, Zhu W, Ganguli K *et al.* Anti-inflammatory effects of *Bifidobacterium longum* subsp  
887 *infantis* secretions on fetal human enterocytes are mediated by TLR-4 receptors. *Am J*  
888 *Physiol Liver Physiol* 2016;**311**:G744–53.
- 889 Miranda LN, van der Heijden IM, Costa SF *et al.* *Candida* colonisation as a source for  
890 candidaemia. *J Hosp Infect* 2009;**72**:9–16.
- 891 Mirhakkak MH, Schäuble S, Klassert TE *et al.* Metabolic modeling predicts specific gut  
892 bacteria as key determinants for *Candida albicans* colonization levels. *ISME J*  
893 2020;**15**:1257–70.
- 894 Miyazaki K, Martin J., Marinsek-Logar R *et al.* Degradation and Utilization of Xylans by the  
895 Rumen Anaerobe *Prevotella bryantii* (formerly *P. ruminicola* subsp. *brevis*) B14.  
896 *Anaerobe* 1997;**3**:373–81.
- 897 Mohan R, Namsolleck P, Lawson PA *et al.* *Clostridium asparagiforme* sp. nov., isolated from  
898 a human faecal sample. *Syst Appl Microbiol* 2006;**29**:292–9.
- 899 Mortensen PB, Clausen MR. Short-chain fatty acids in the human colon: relation to  
900 gastrointestinal health and disease. *Scand J Gastroenterol Suppl* 1996;**216**:132–48.
- 901 Nash AK, Auchtung TA, Wong MC *et al.* The gut mycobiome of the Human Microbiome  
902 Project healthy cohort. *Microbiome* 2017;**5**:153.
- 903 Neville BA, d’Enfert C, Bounoux M-E. *Candida albicans* commensalism in the  
904 gastrointestinal tract. Munro C (ed.). *FEMS Yeast Res* 2015;**15**:fov081.



- 905 Odds FC. Molecular phylogenetics and epidemiology of *Candida albicans*. *Future Microbiol*  
906 2010;**5**:67–79.
- 907 Odds FC, Kibbler CC, Walker E *et al*. Carriage of *Candida* species and *C albicans* Biotypes in  
908 Patients Undergoing Chemotherapy or Bone Marrow Transplantation for Haematological  
909 Disease. *J Clin Pathol* 1989;**42**:1259-66.
- 910 Pasolli E, Asnicar F, Manara S *et al*. Extensive Unexplored Human Microbiome Diversity  
911 Revealed by Over 150,000 Genomes from Metagenomes Spanning Age, Geography, and  
912 Lifestyle. *Cell* 2019;**176**:1–14.
- 913 Pfaller MA, Jones RN, Doern G V. *et al*. Bloodstream infections due to *Candida* species:  
914 SENTRY Antimicrobial Surveillance Program in north America and Latin America, 1997-  
915 1998. *Antimicrob Agents Chemother* 2000;**44**:747–51.
- 916 Pittet D, Monod M, Suter PM *et al*. *Candida* Colonization and Subsequent Infections in  
917 Critically Ill Surgical Patients. *Ann Surg* 1994;**220**:751–8.
- 918 Quast C, Pruesse E, Yilmaz P *et al*. The SILVA ribosomal RNA gene database project: improved  
919 data processing and web-based tools. *Nucleic Acids Res* 2013;D590–D596.
- 920 Rea MC, Sit CS, Clayton E *et al*. Thuricin CD, a posttranslationally modified bacteriocin with  
921 a narrow spectrum of activity against *Clostridium difficile*. *Proc Natl Acad Sci U S A*  
922 2010;**107**:9352–7.
- 923 Reichardt N, Duncan SH, Young P *et al*. Phylogenetic distribution of three pathways for  
924 propionate production within the human gut microbiota. *ISME J* 2014;**8**:1323–35.
- 925 Reuter G. Comparative studies on the *Bifidus* flora in the feces of infants and adults. *Zentralbl*  
926 *Bakteriol Orig* 1963;**191**:486–507.
- 927 Richardson AJ, Calder AG, Stewart CS *et al*. Simultaneous determination of volatile and non-  
928 volatile acidic fermentation products of anaerobes by capillary gas chromatography. *Lett*  
929 *Appl Microbiol* 1989;**9**:5–8.

- 930 Rivera-Chávez F, Zhang LF, Faber F *et al.* Depletion of Butyrate-Producing *Clostridia* from  
931 the Gut Microbiota Drives an Aerobic Luminal Expansion of *Salmonella*. *Cell Host*  
932 *Microbe* 2016;**19**:443–54.
- 933 Rivière A, Moens F, Selak M *et al.* The Ability of Bifidobacteria To Degrade Arabinoxylan  
934 Oligosaccharide Constituents and Derived Oligosaccharides Is Strain Dependent. *Appl*  
935 *Environ Microbiol* 2014;**80**:204–17.
- 936 Roe AJ, O’Byrne C, McLaggan D *et al.* Inhibition of *Escherichia coli* growth by acetic acid: A  
937 problem with methionine biosynthesis and homocysteine toxicity. *Microbiology*  
938 2002;**148**:2215–22.
- 939 Romeo MG, Romeo DM, Trovato L *et al.* Role of probiotics in the prevention of the enteric  
940 colonization by *Candida* in preterm newborns: incidence of late-onset sepsis and  
941 neurological outcome. *J Perinatol* 2011;**31**:63–9.
- 942 Rossi M, Corradini C, Amaretti A *et al.* Fermentation of fructooligosaccharides and inulin by  
943 bifidobacteria: a comparative study of pure and fecal cultures. *Appl Environ Microbiol*  
944 2005;**71**:6150–8.
- 945 Rossi O, Khan MT, Schwarzer M *et al.* Faecalibacterium prausnitzii Strain HTF-F and Its  
946 Extracellular Polymeric Matrix Attenuate Clinical Parameters in DSS-Induced Colitis.  
947 Riedel CU (ed.). *PLoS One* 2015;**10**:e0123013.
- 948 Roy A, Chaudhuri J, Sarkar D *et al.* Role of enteric supplementation of Probiotics on late-onset  
949 sepsis by *Candida* species in preterm low birth weight neonates: A randomized, double  
950 blind, placebo-controlled trial. *N Am J Med Sci* 2014;**6**:50–7.
- 951 Russell WR, Duncan SH, Scobbie L *et al.* Major phenylpropanoid-derived metabolites in the  
952 human gut can arise from microbial fermentation of protein. *Mol Nutr Food Res*  
953 2013;**57**:523–35.
- 954 Samonis G, Anastassiadou H, Dassiou M *et al.* Effects of broad-spectrum antibiotics on

- 955           colonization of gastrointestinal tracts of mice by *Candida albicans*. *Antimicrob Agents*  
956           *Chemother* 1994;**38**:602–3.
- 957   Schloss PD, Westcott SL, Ryabin T *et al*. Introducing mothur: open-source, platform-  
958           independent, community-supported software for describing and comparing microbial  
959           communities. *Appl Environ Microbiol* 2009;**75**:7537–41.
- 960   Schwiertz A, Hold GL, Duncan SH *et al*. *Anaerostipes caccae* gen. nov., sp. nov., a New  
961           Saccharolytic, Acetate-utilising, Butyrate-producing Bacterium from Human Faeces. *Syst*  
962           *Appl Microbiol* 2002;**25**:46–51.
- 963   Segata N, Izard J, Waldron L *et al*. Metagenomic biomarker discovery and explanation.  
964           *Genome Biol* 2011;**12**:R60.
- 965   Seguin P. Culture du *Fusobacterium plauti* forme mobile du bacille fusiforme. *Comptes Rendus*  
966           *des Seances la Soc Biol* 1928;**99**:439-442.
- 967   Shetty SA, Zuffa S, Bui TPN *et al*. Reclassification of eubacterium hallii as *Anaerobutyricum*  
968           *hallii* gen. nov., comb. nov., and description of *Anaerobutyricum soehngenii* sp. nov., a  
969           butyrate and propionate-producing bacterium from infant faeces. *Int J Syst Evol Microbiol*  
970           2018;**68**:3741–6.
- 971   Stecher B, Robbiani R, Walker AW *et al*. *Salmonella enterica* Serovar Typhimurium Exploits  
972           Inflammation to Compete with the Intestinal Microbiota. Waldor M (ed.). *PLoS Biol*  
973           2007;**5**:e244.
- 974   Steer T, Collins MD, Gibson GR *et al*. *Clostridium hathewayi* sp. nov., from human faeces.  
975           *Syst Appl Microbiol* 2001;**24**:353–7.
- 976   Tan TG, Sefik E, Geva-Zatorsky N *et al*. Identifying species of symbiont bacteria from the  
977           human gut that, alone, can induce intestinal Th17 cells in mice. *Proc Natl Acad Sci U S A*  
978           2016;**113**:E8141–50.
- 979   Thaiss CA, Zmora N, Levy M *et al*. The microbiome and innate immunity. *Nature*

- 980 2016;**535**:65–74.
- 981 Veillon A, Zuber A. Recherches sur quelques microbes strictment anaérobies et leur rôle en  
982 pathologie. *Arch Med Exp Anat Pathol* 1898;**10**:517-54.
- 983 Ventura M, Montes SA, Ruiz L *et al.* High Iron-Sequestering Bifidobacteria Inhibit  
984 Enteropathogen Growth and Adhesion to Intestinal Epithelial Cells *In vitro*. *Front*  
985 *Microbiol* 2016;**7**:1480.
- 986 Vollaard EJ, Clasener HA JA. Co-trimoxazole Impairs Colonization Resistance in Healthy  
987 Volunteers. *J Antimicrob Chemother* 1992;**30**(5):685-.
- 988 Walker AW, Duncan SH, Harmsen HJM *et al.* The species composition of the human intestinal  
989 microbiota differs between particle-associated and liquid phase communities. *Environ*  
990 *Microbiol* 2008;**10**:3275–83.
- 991 Walker AW, Ince J, Duncan SH *et al.* Dominant and diet-responsive groups of bacteria within  
992 the human colonic microbiota. *ISME J* 2011;**5**:220–30.
- 993 Warren YA, Tyrrell KL, Citron DM *et al.* *Clostridium aldenense* sp. nov. and *Clostridium*  
994 *citroniae* sp. nov. isolated from human clinical infections. *J Clin Microbiol* 2006;**44**:2416–  
995 22.
- 996 Whaley SG, Berkow EL, Rybak JM *et al.* Azole Antifungal Resistance in *Candida albicans*  
997 and Emerging Non-albicans Candida Species. *Front Microbiol* 2016;**7**:2173.
- 998 Whitman WB, Coleman DC, Wiebe WJ. Perspective Prokaryotes: The unseen majority. *Proc*  
999 *Natl Acad Sci U S A* 1998;**95**:6578–83.
- 1000 Wilson KH, Perini F. Role of competition for nutrients in suppression of *Clostridium difficile*  
1001 by the colonic microflora. *Infect Immun* 1988;**56**:2610–4.
- 1002 Yatsunencko T, Rey FE, Manary MJ *et al.* Human gut microbiome viewed across age and  
1003 geography. *Nature* 2012;**486**:222–7.
- 1004 Zangl I, Pap IJ, Aspöck C *et al.* The role of *Lactobacillus* species in the control of *Candida* via

- 1005            biotrophic interactions. *Microb Cell* 2020;**7**:1–14.
- 1006    Ze X, Duncan SH, Louis P *et al.* *Ruminococcus bromii* is a keystone species for the degradation  
1007            of resistant starch in the human colon. *ISME J* 2012;**6**:1535–43.
- 1008    Zhai B, Ola M, Rolling T *et al.* High-resolution mycobiota analysis reveals dynamic intestinal  
1009            translocation preceding invasive candidiasis. *Nat Med* 2020;**26**:59–64.
- 1010
- 1011
